# Supplementary material for: Highly diastereoselective synthesis of quinoline-2,5-diones and pyrazolo[3,4-b]pyridin-6(7H)-ones under microwave irradiation
Source: Royal Society of Chemistry journal article supplement (doi:10.1039/c4ra10096d), 2014-01-01

## *Supporting Information for*

### Highly diastereoselective synthesis of quinoline-2,5-diones and pyrazolo[3,4-*b*]pyridin-6(7*H*)-ones under microwave irradiation

*Bo Jiang,<sup>a,\*</sup> Yan-Bo Liang,<sup>a</sup> Li-Fang Kong,<sup>b</sup> Xing-Jun Tu,<sup>a</sup> Wen-Juan Hao,<sup>a</sup> Qin Ye,<sup>a</sup> and  
Shu-Jiang Tu<sup>a,\*</sup>*

<sup>a</sup>*School of Chemistry and Chemical Engineering, and Jiangsu Key Laboratory of Green Synthetic Chemistry for Functional Materials, Jiangsu Normal University, Jiangsu, P.R. China.*

<sup>b</sup>*Department of Basic Teaching, Air Force Logistic Academy, Xuzhou, Jiangsu, P. R. China.*

*E-mail: jiangchem@jsnu.edu.cn (B. Jiang); laotu@jsnu.edu.cn (S.-J. Tu)*

## **Table of Contents**

Copies of <sup>1</sup>H and <sup>13</sup>C NMR Spectra for Compounds **4a-4m**-----S2-S15

Copies of <sup>1</sup>H and <sup>13</sup>C NMR Spectra for Compounds **6a-6g**----- S16-S22

## Copies of Spectra for Products 4 and 6

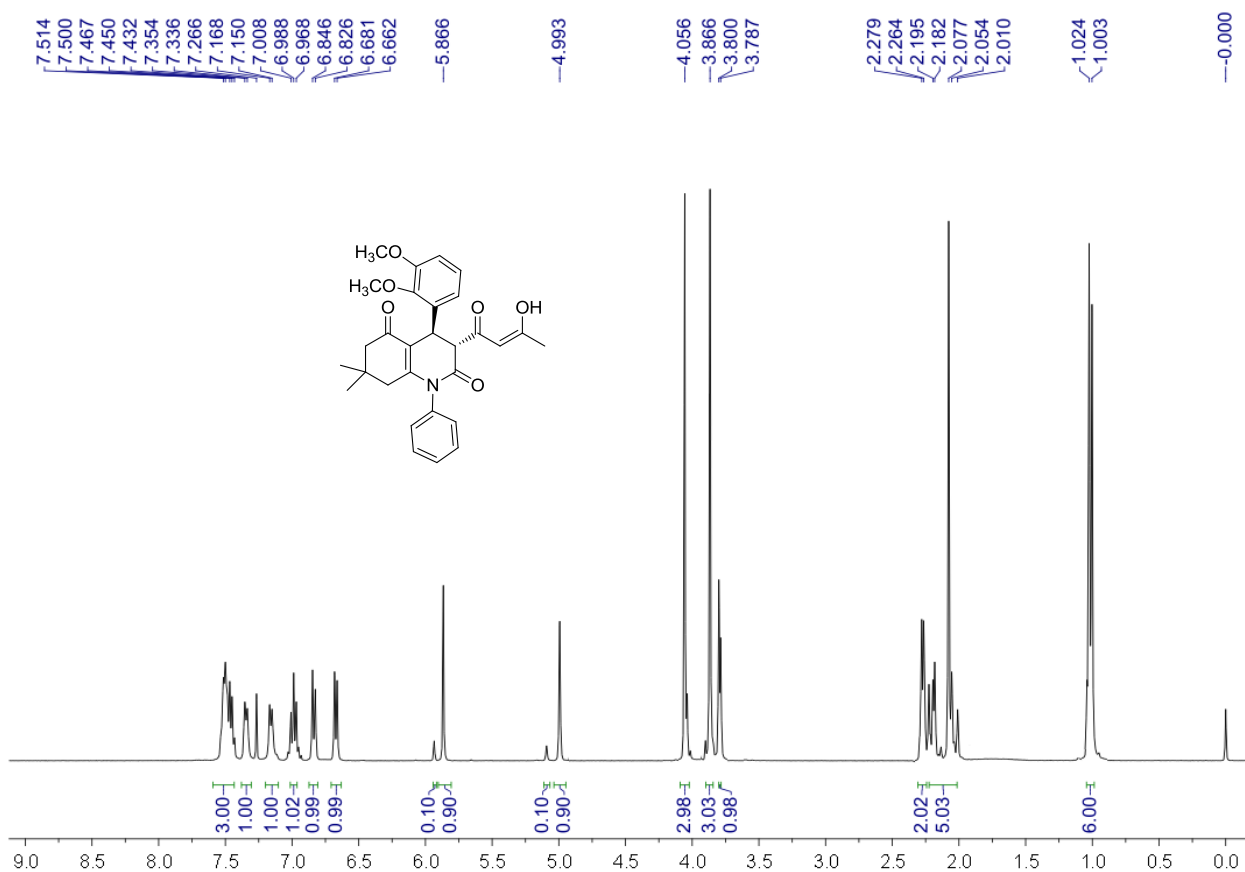

## <sup>13</sup>C NMR Spectrum of Compound 4a

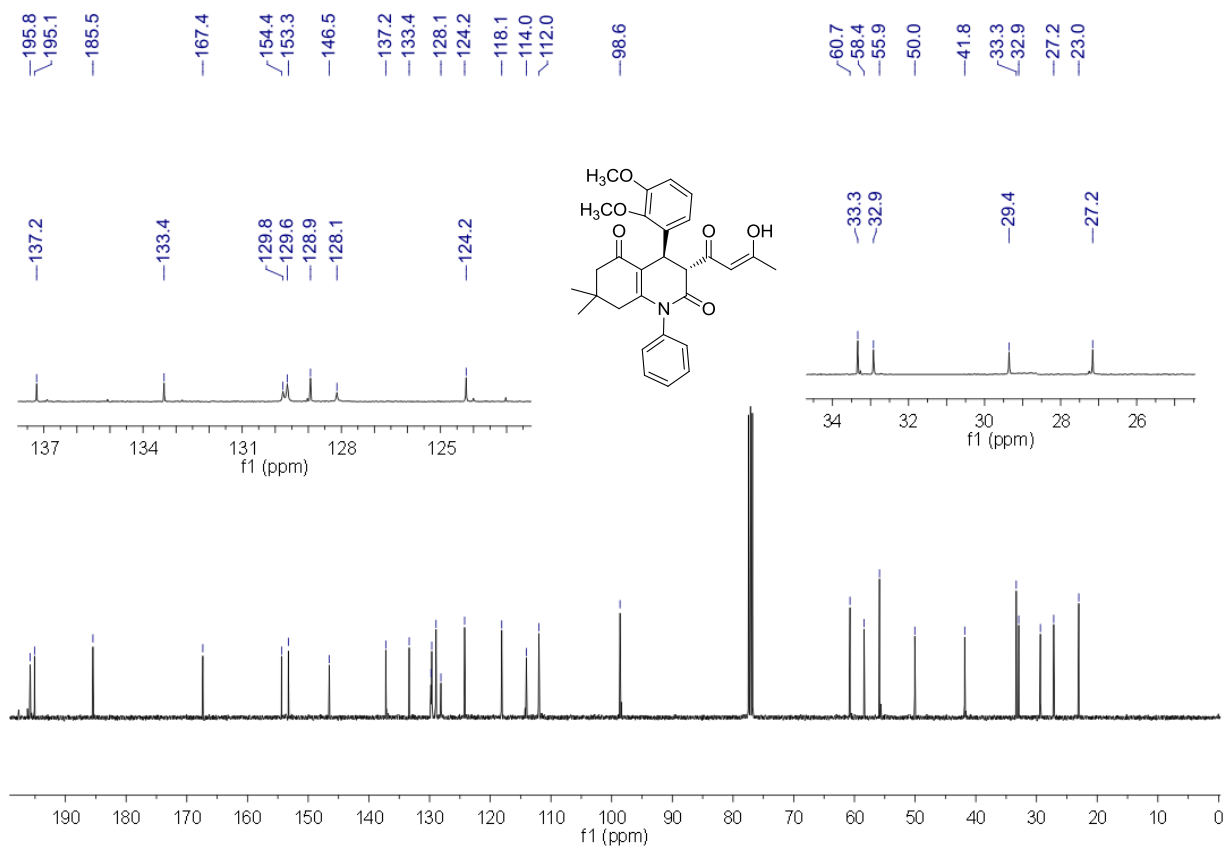

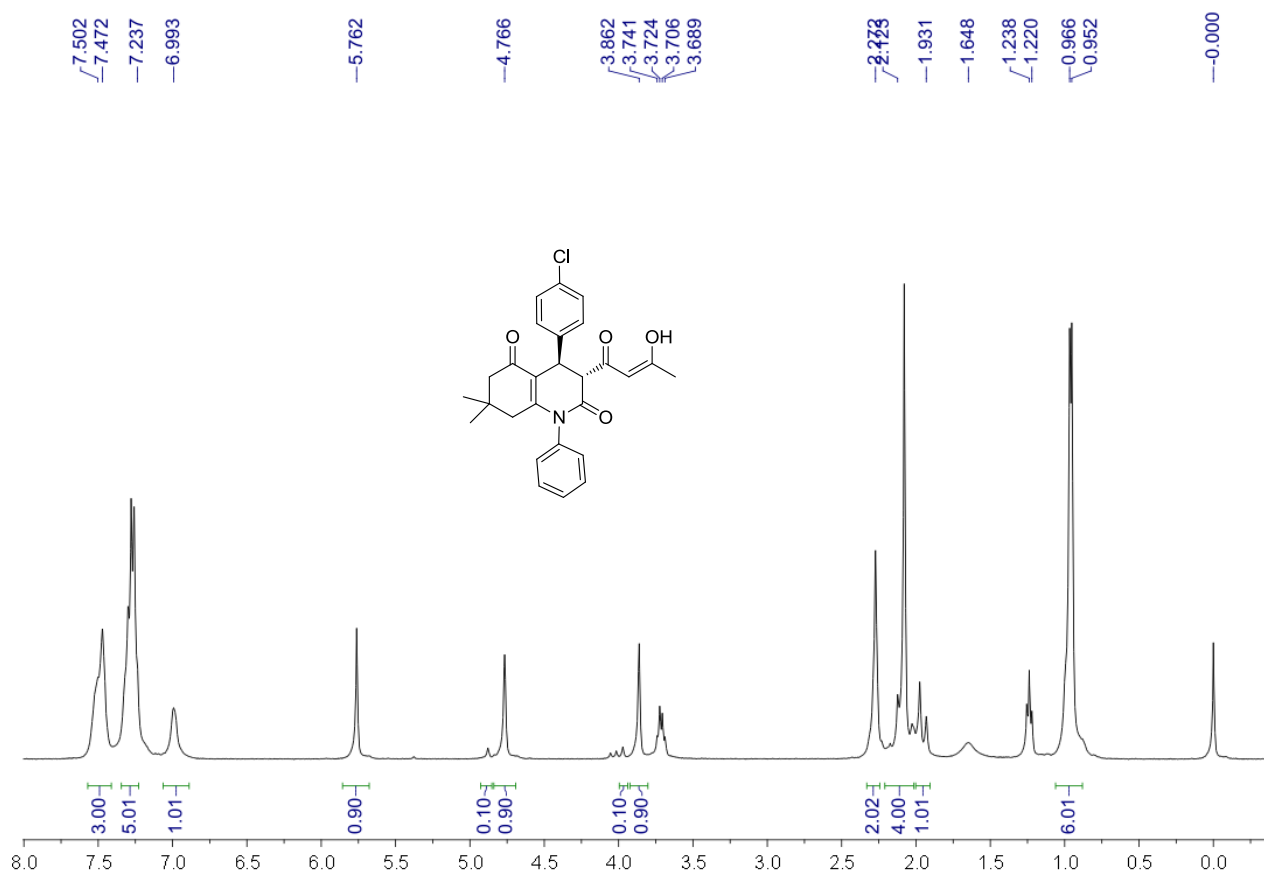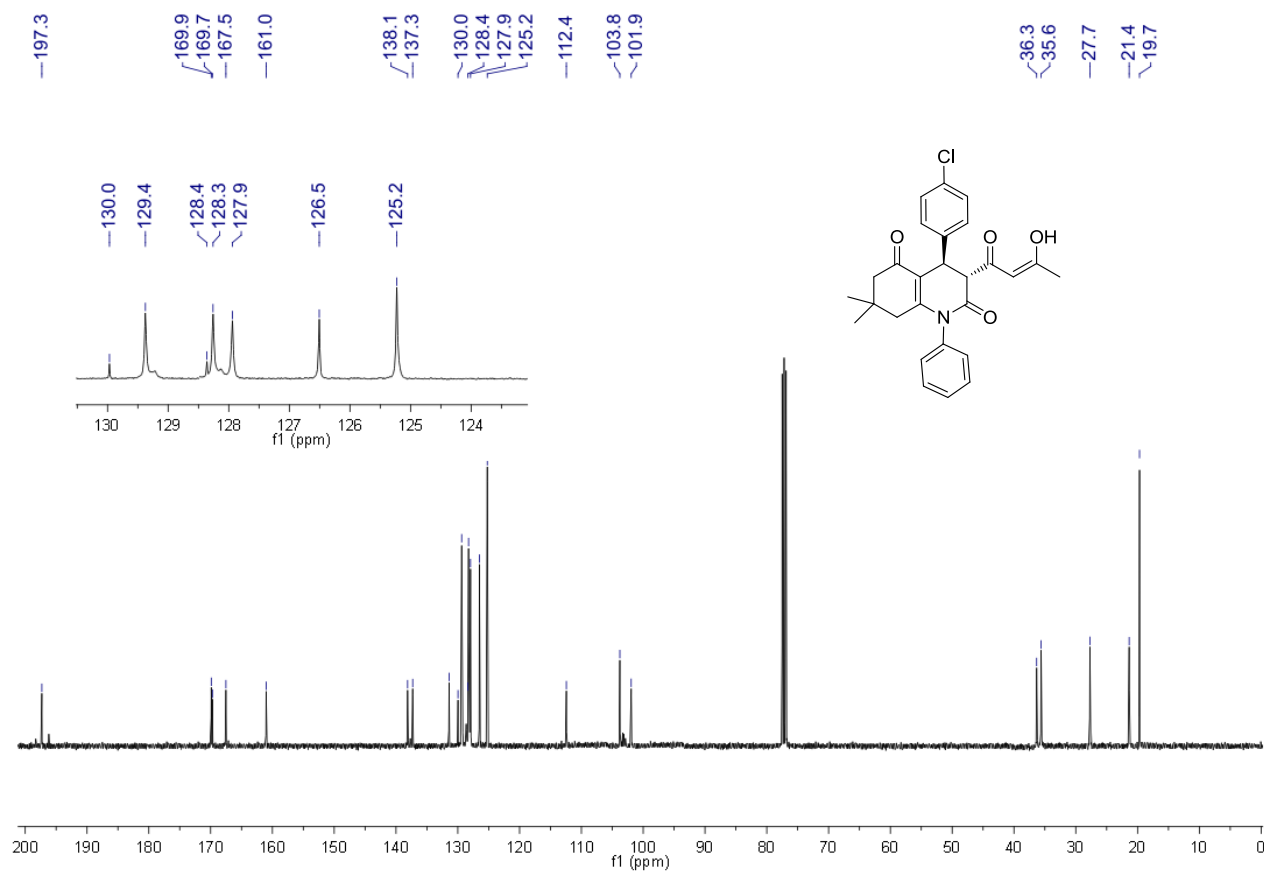

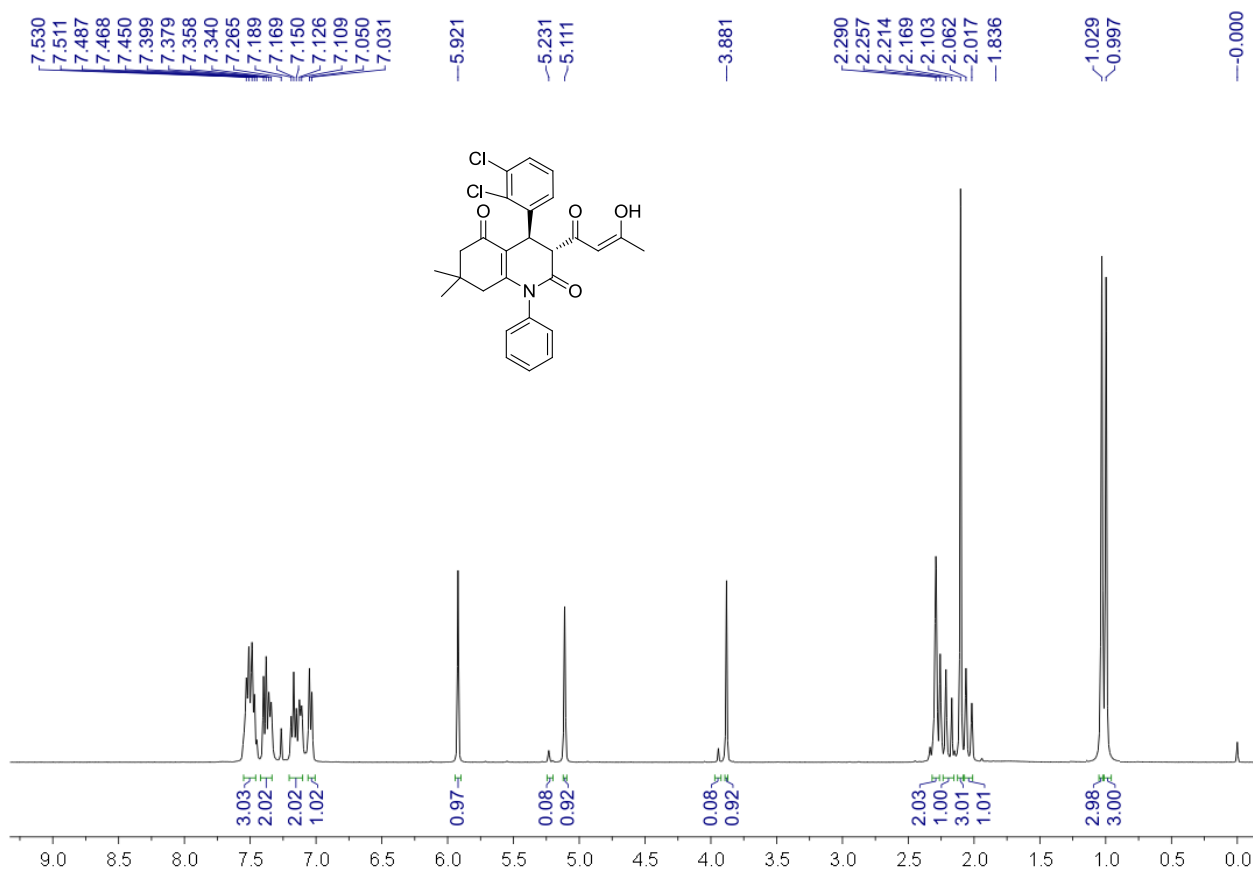

**<sup>1</sup>H NMR Spectrum of Compound 4c**

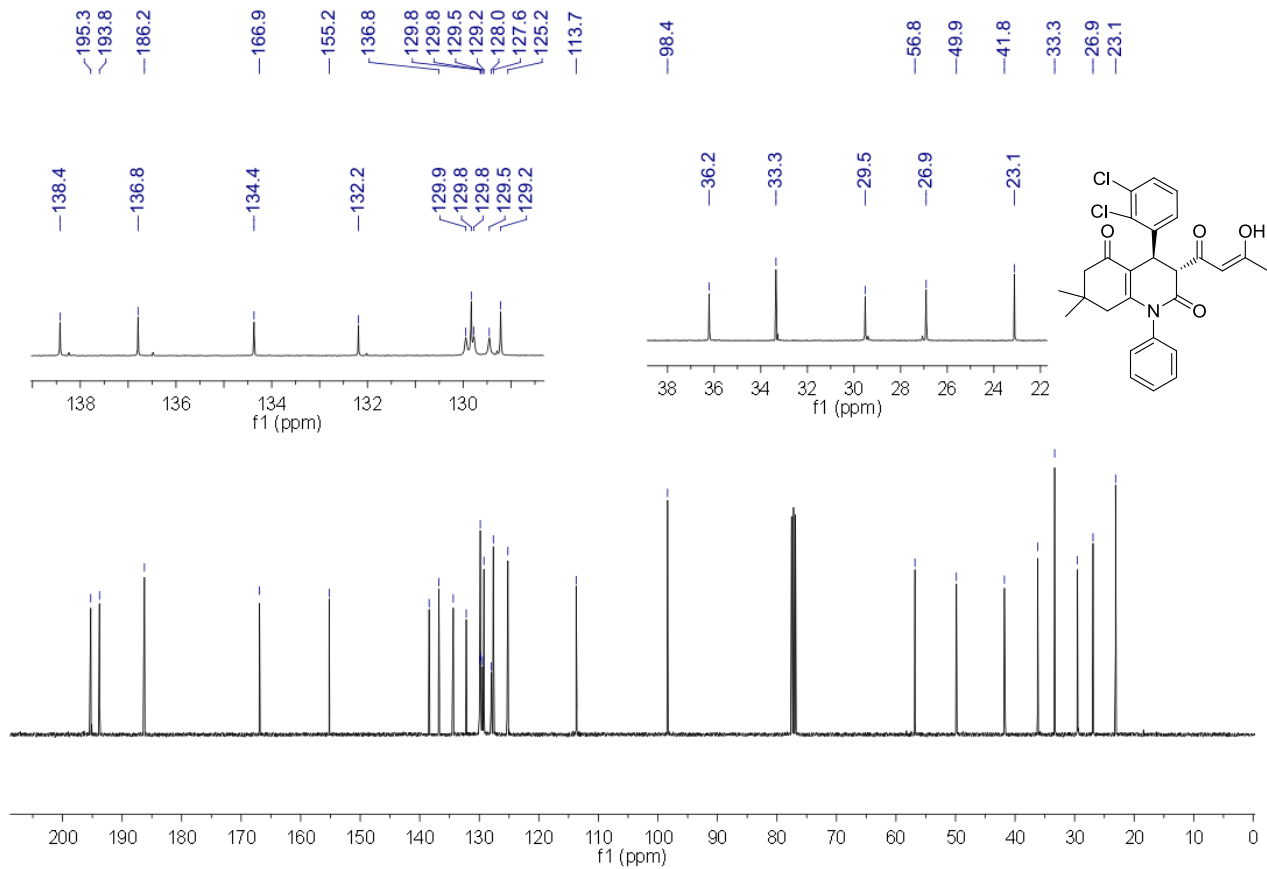

**<sup>13</sup>C NMR Spectrum of Compound 4c**

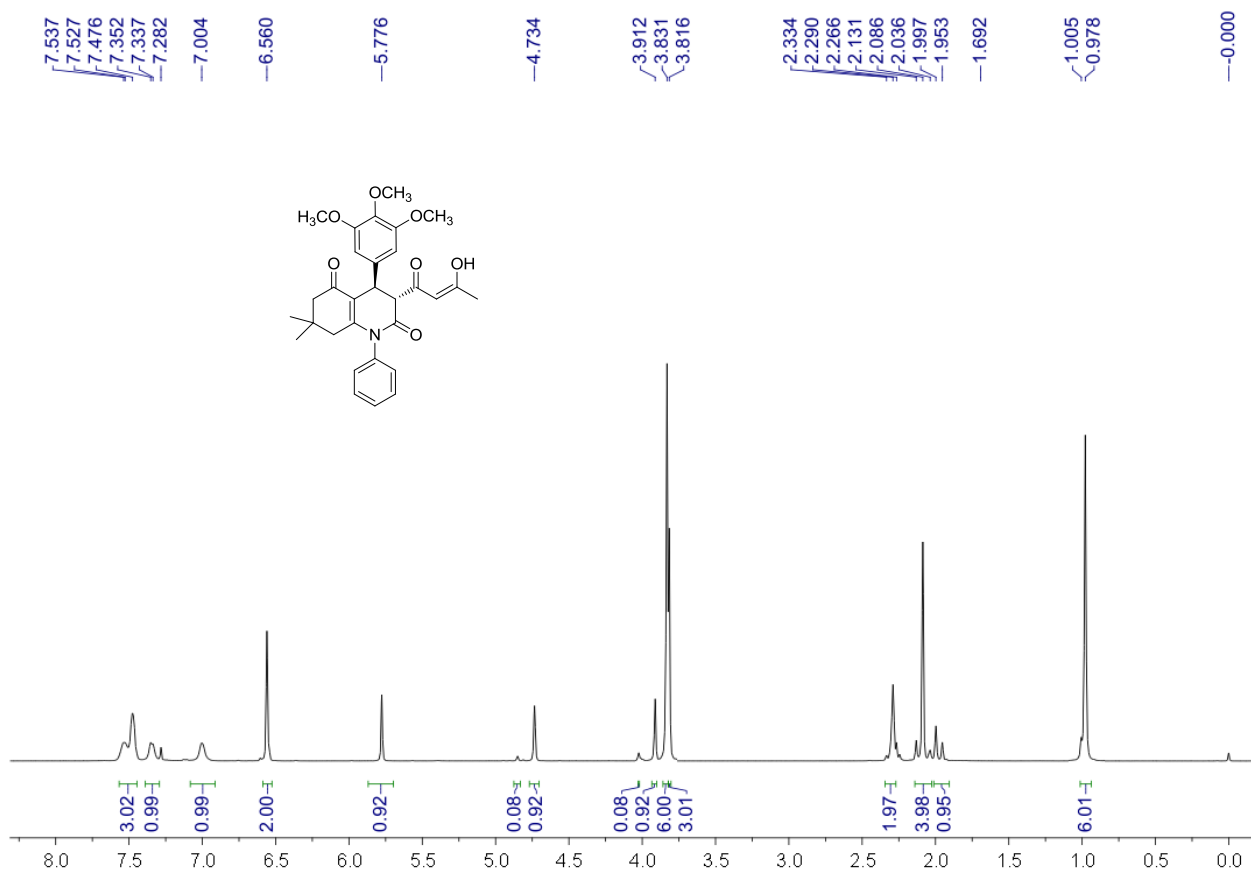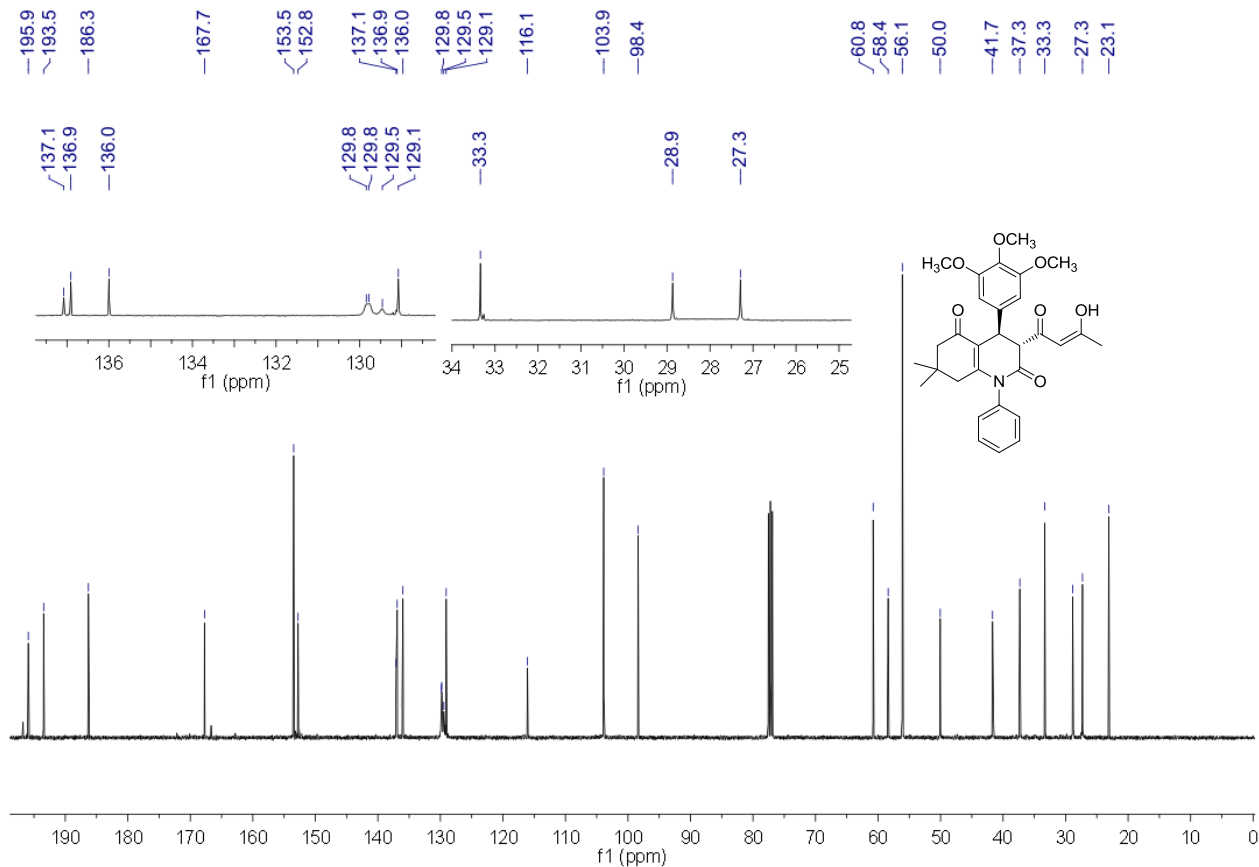

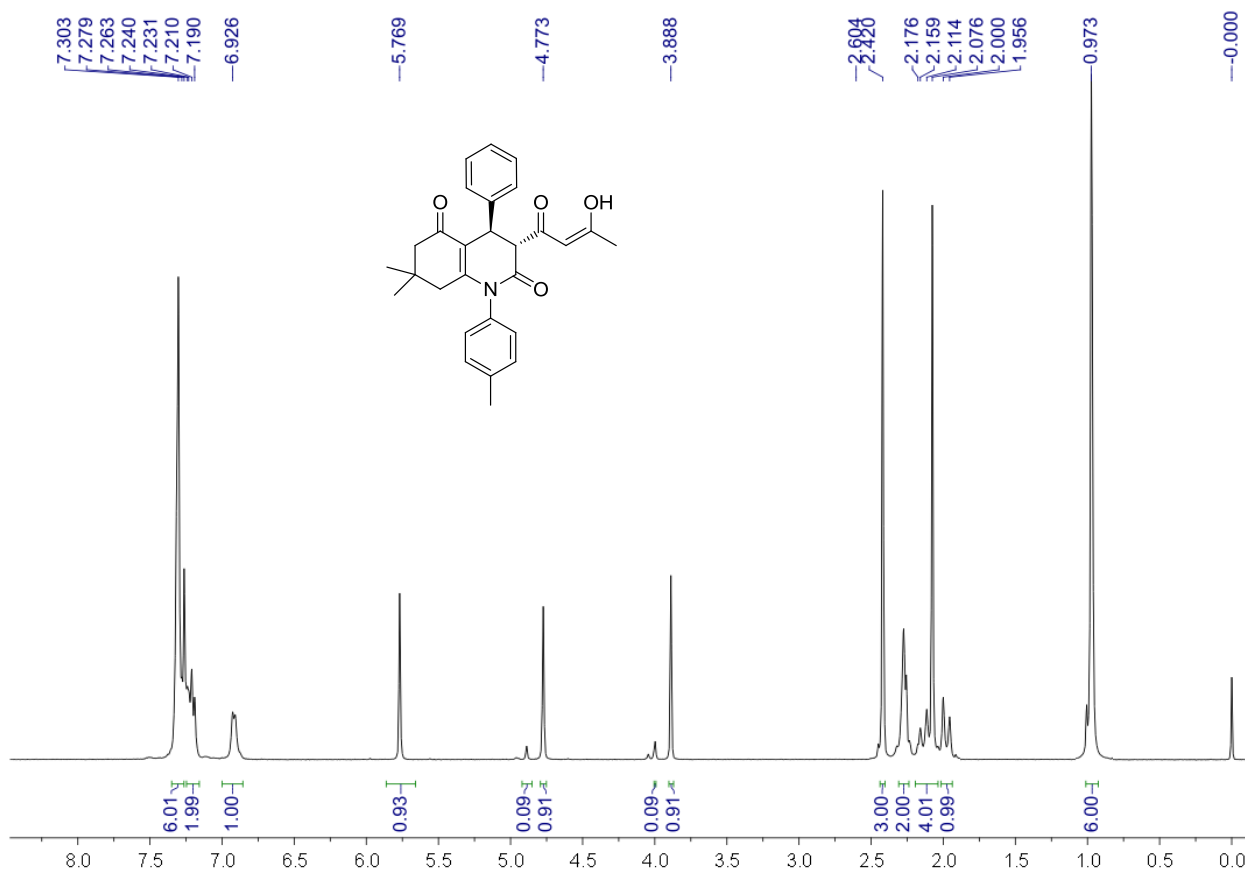

**<sup>1</sup>H NMR Spectrum of Compound 4e**

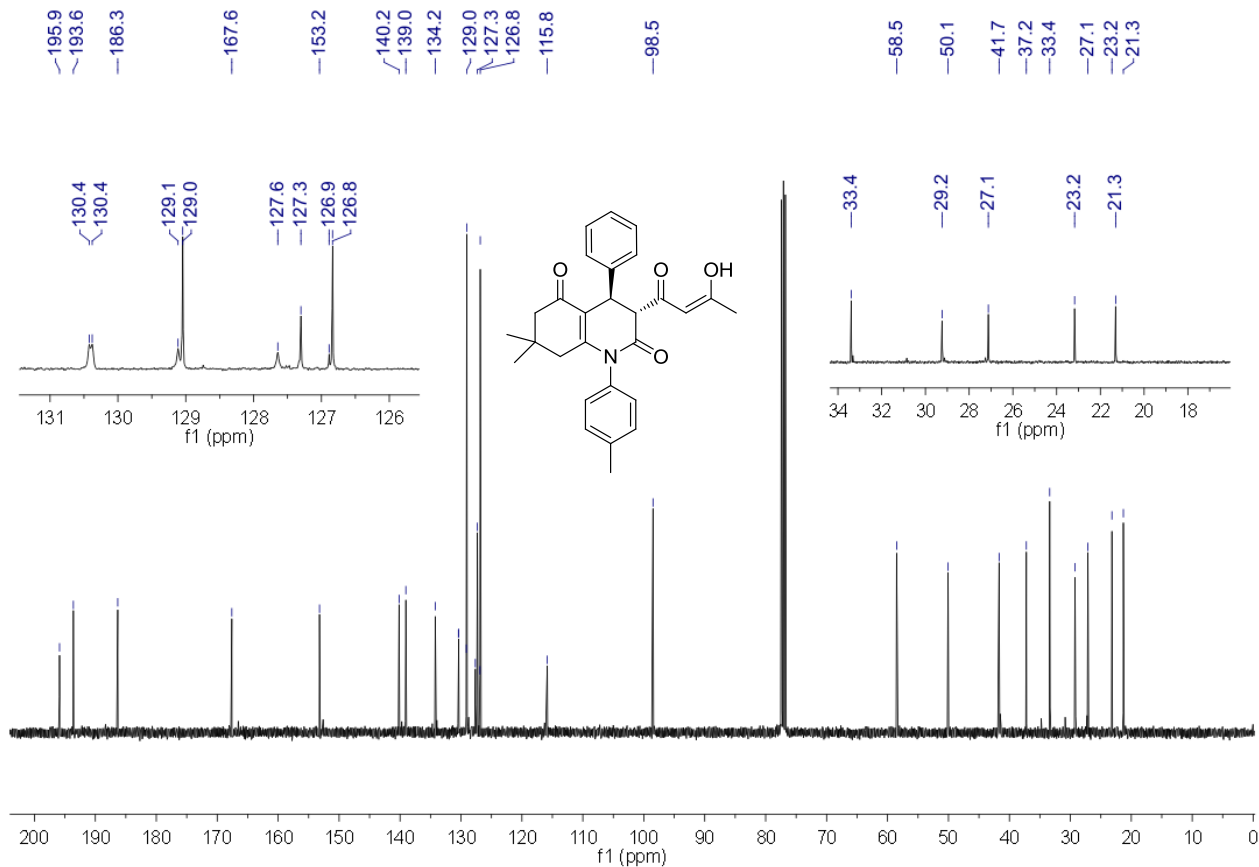

**<sup>13</sup>C NMR Spectrum of Compound 4e**



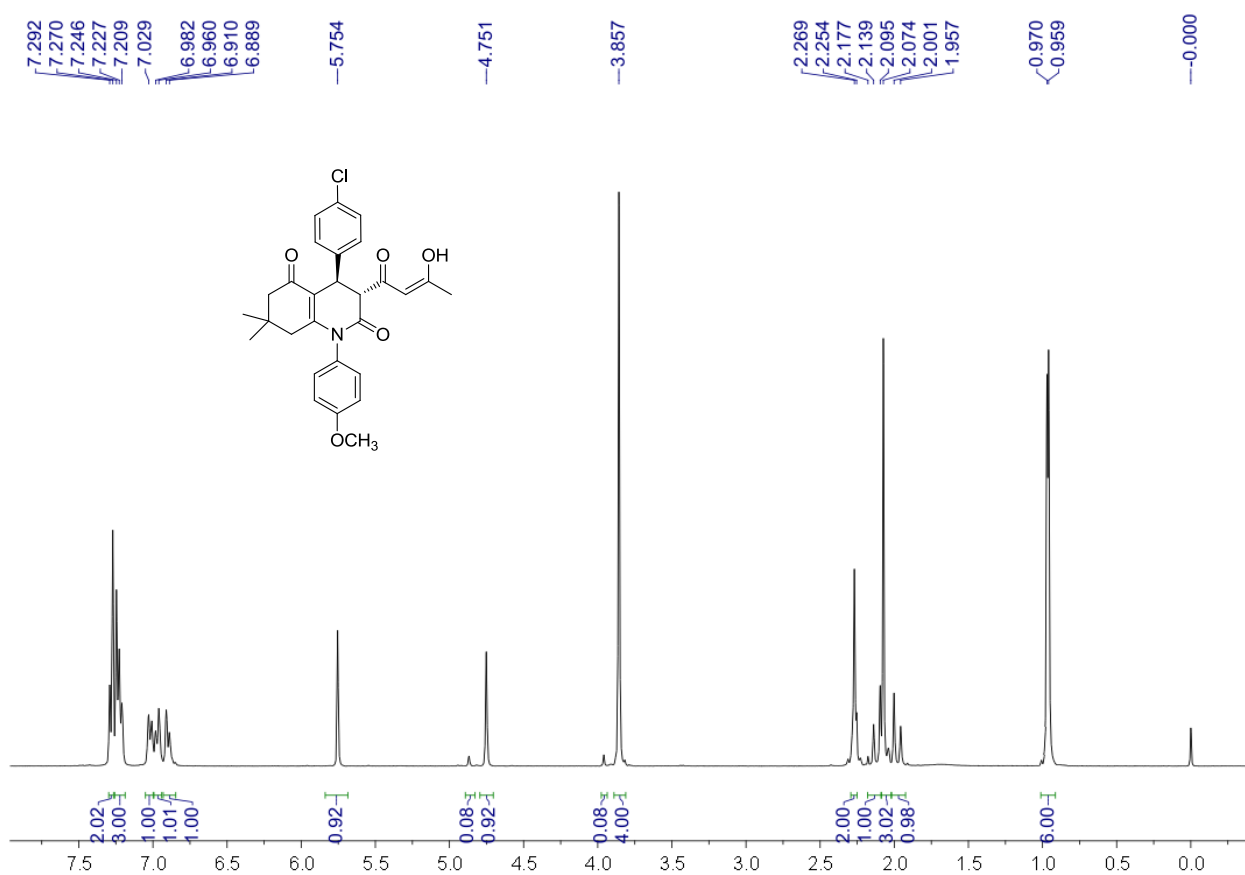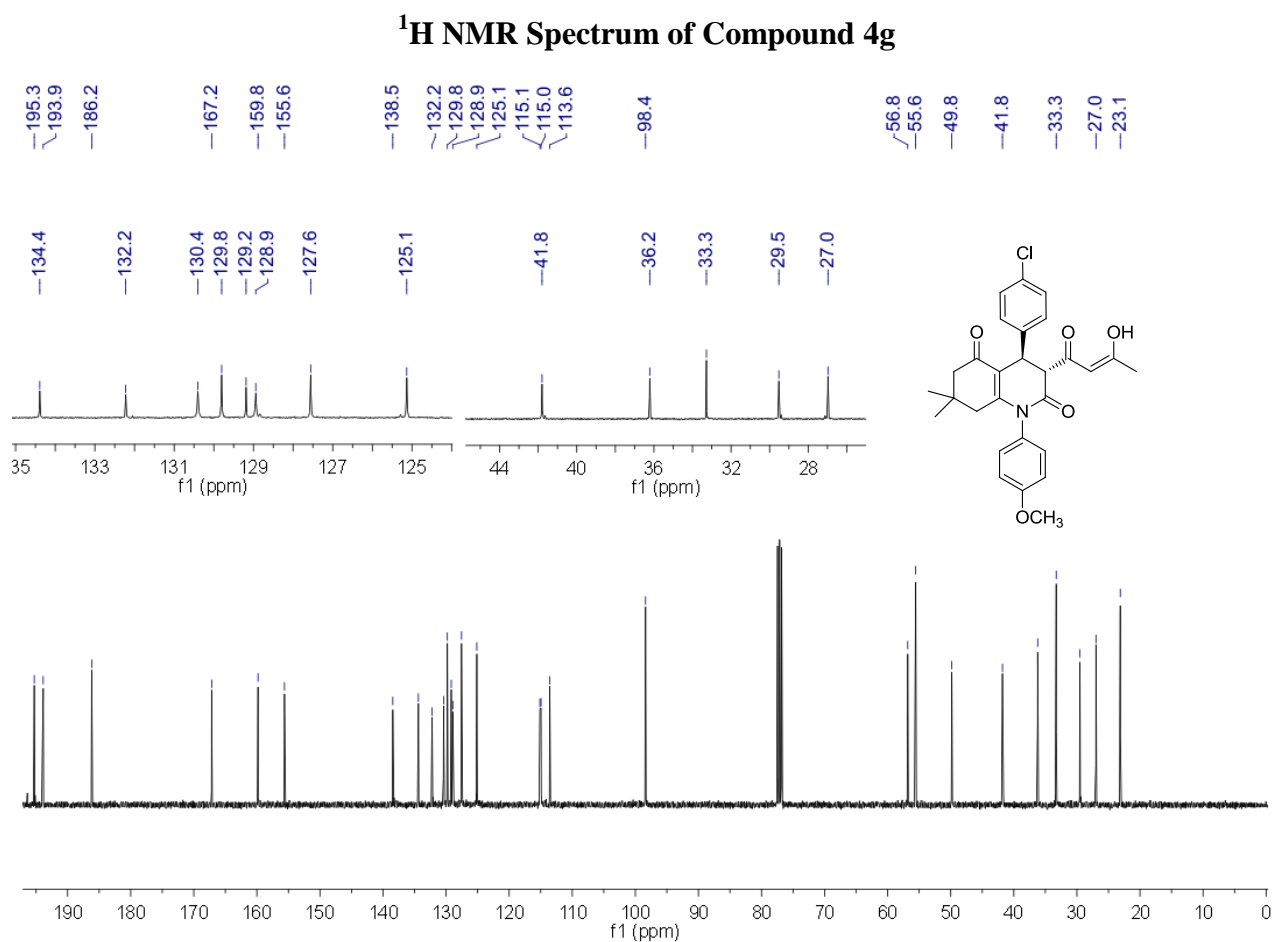

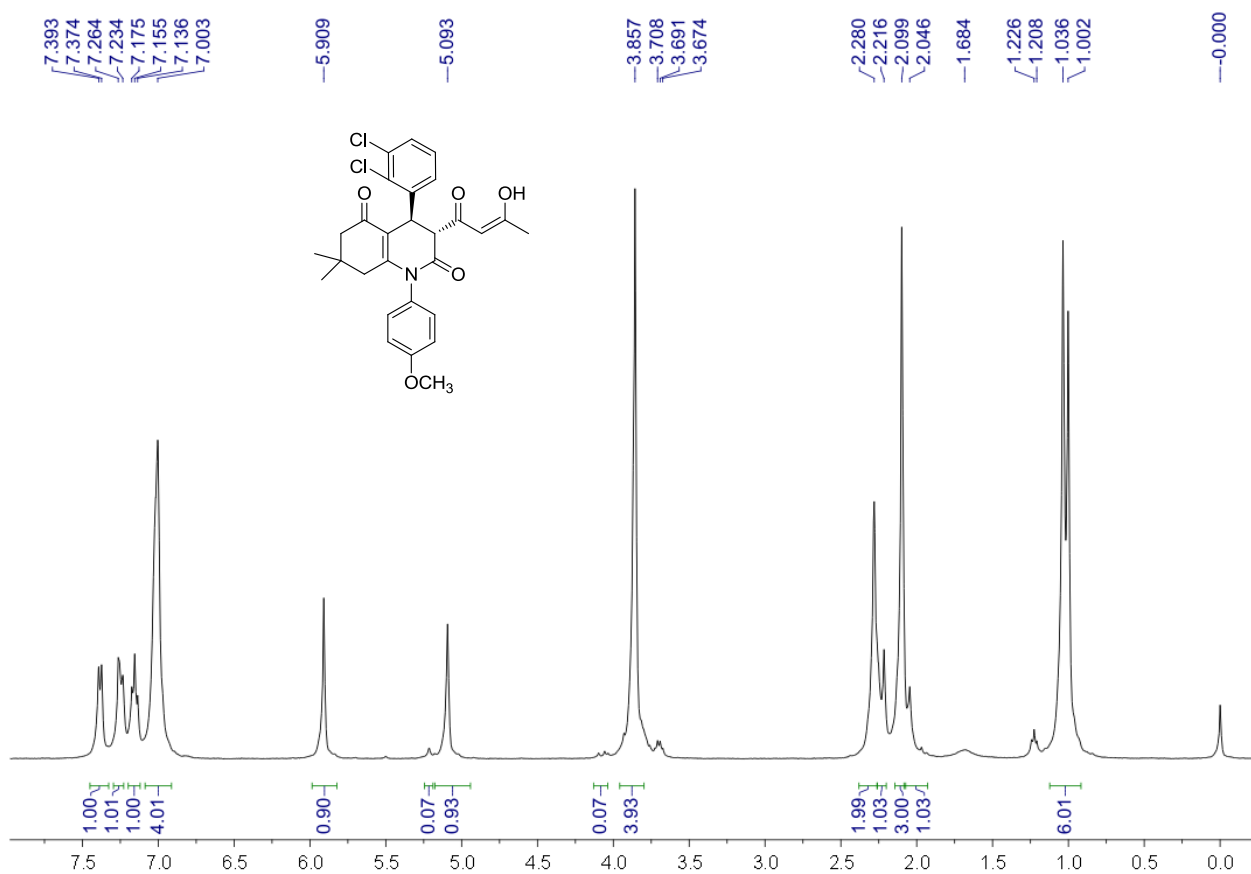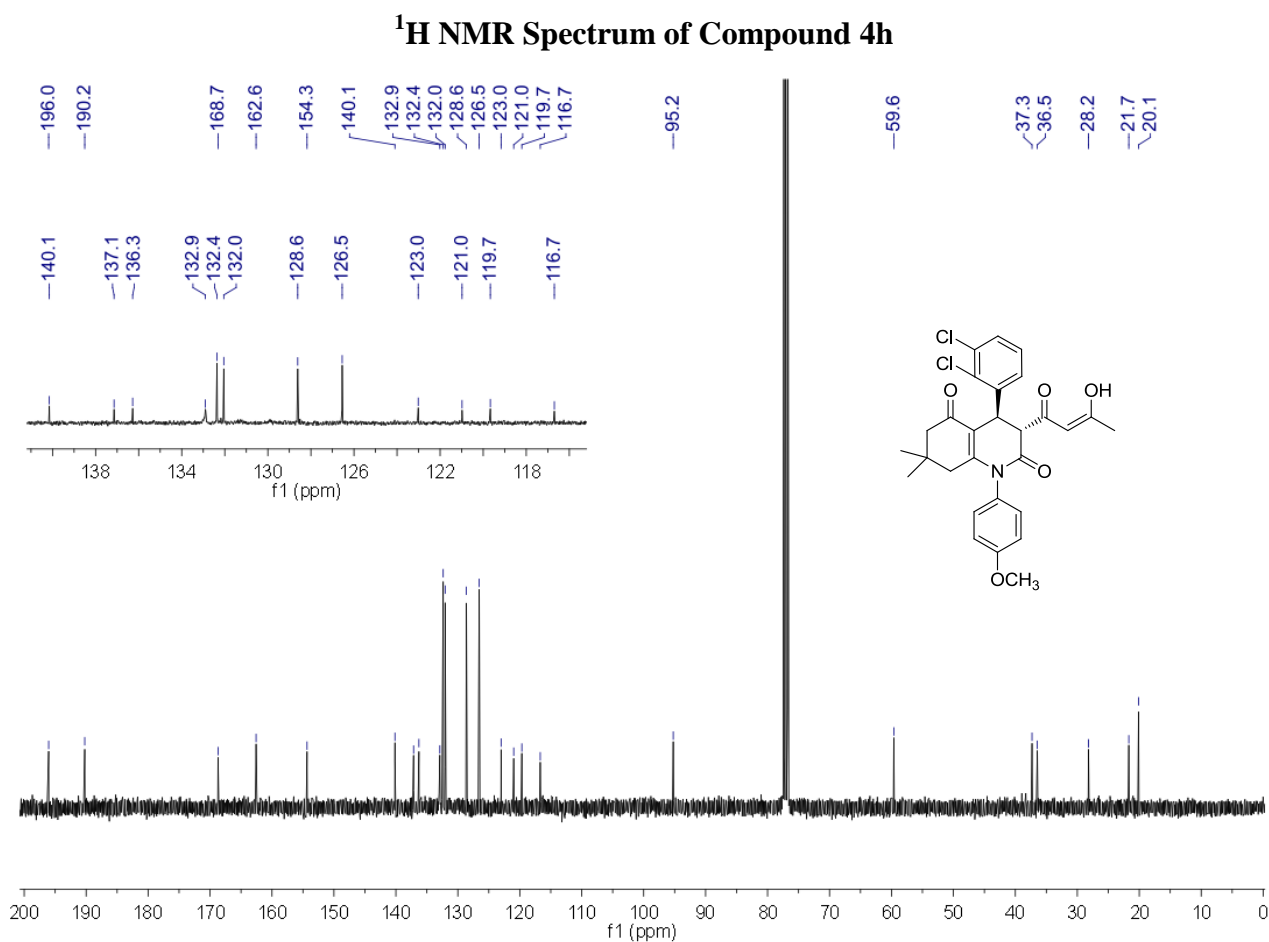

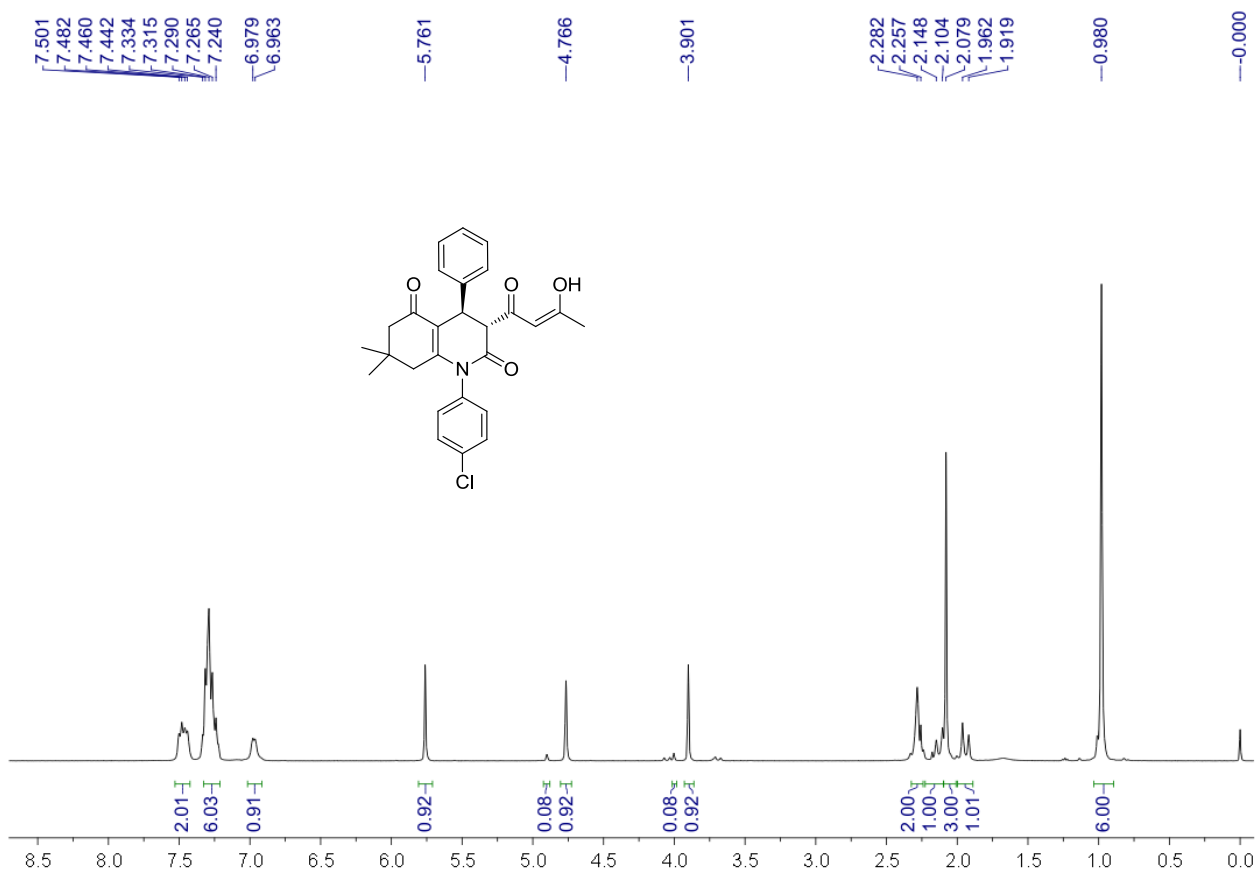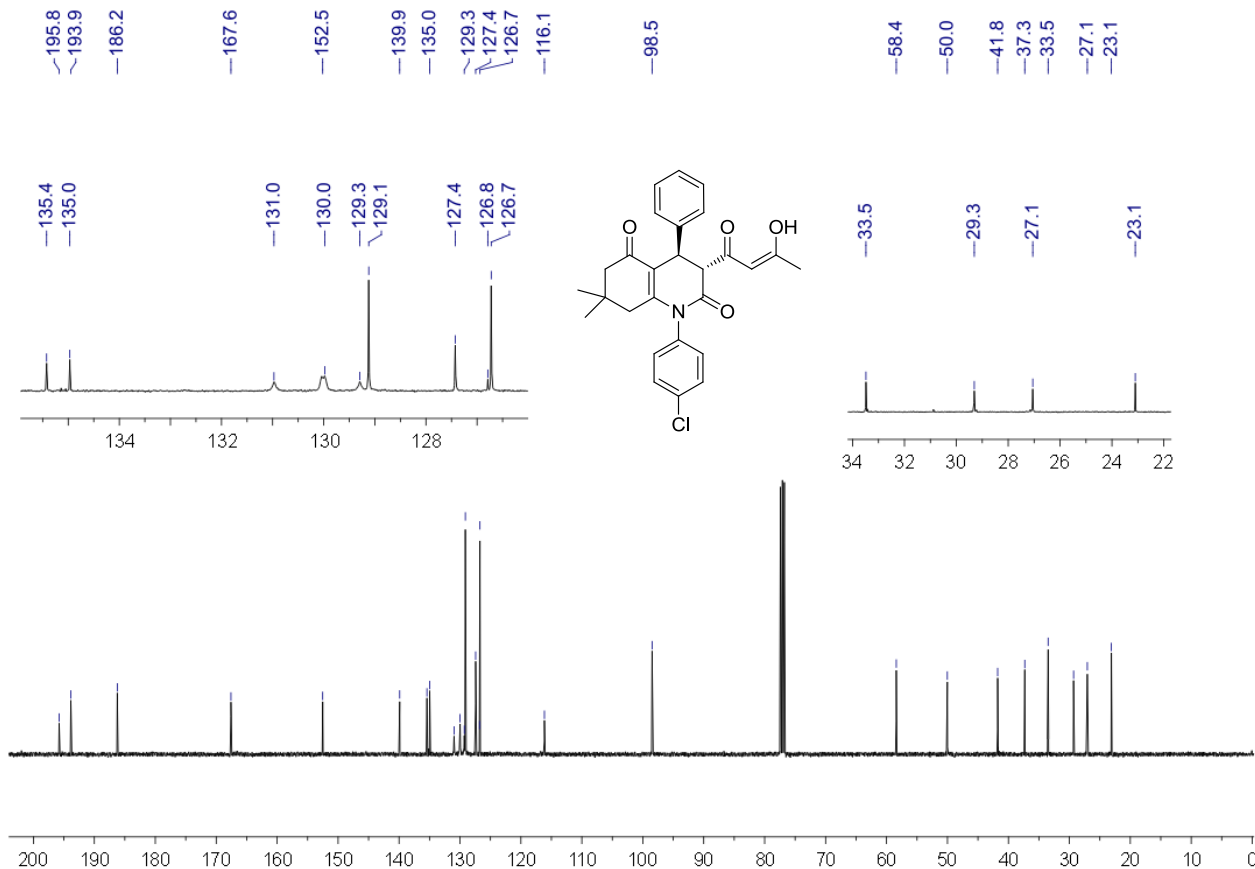

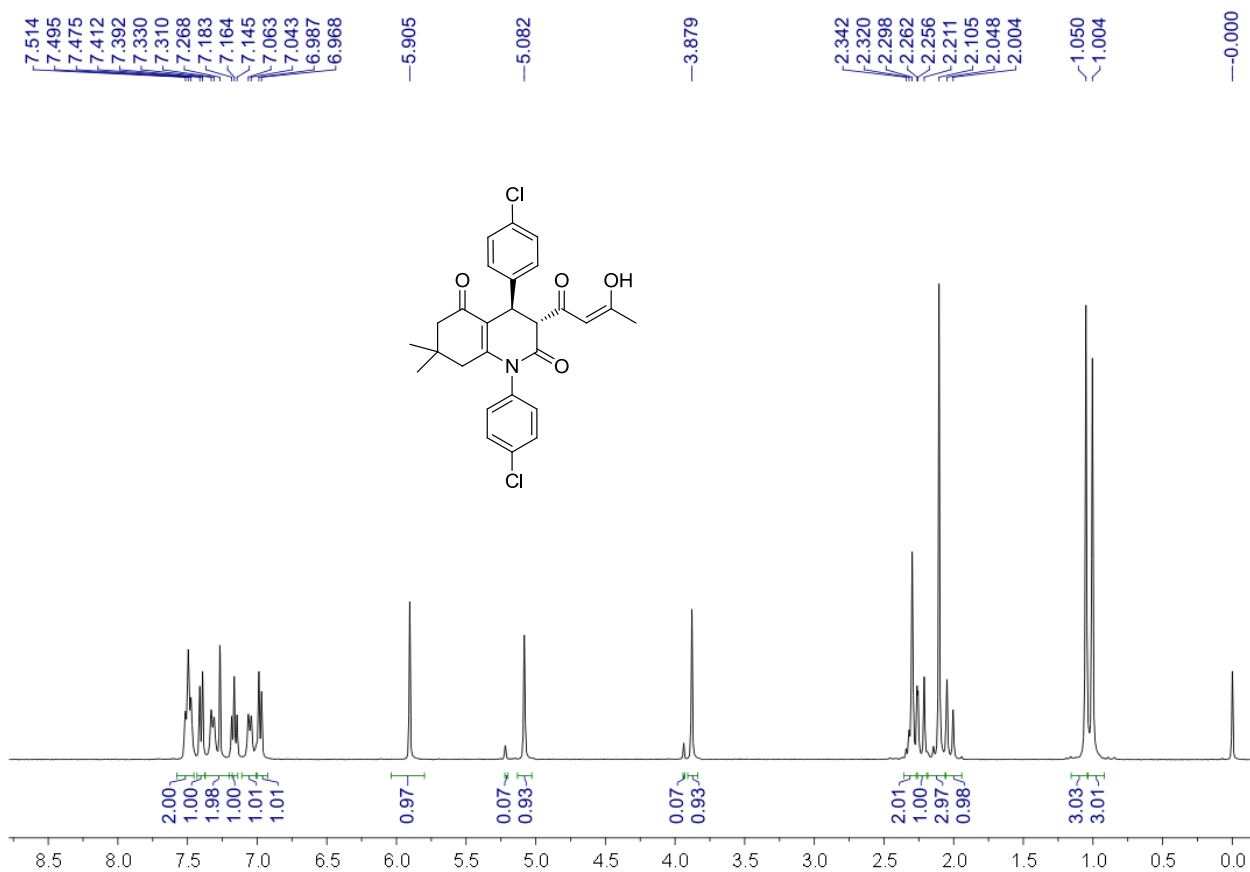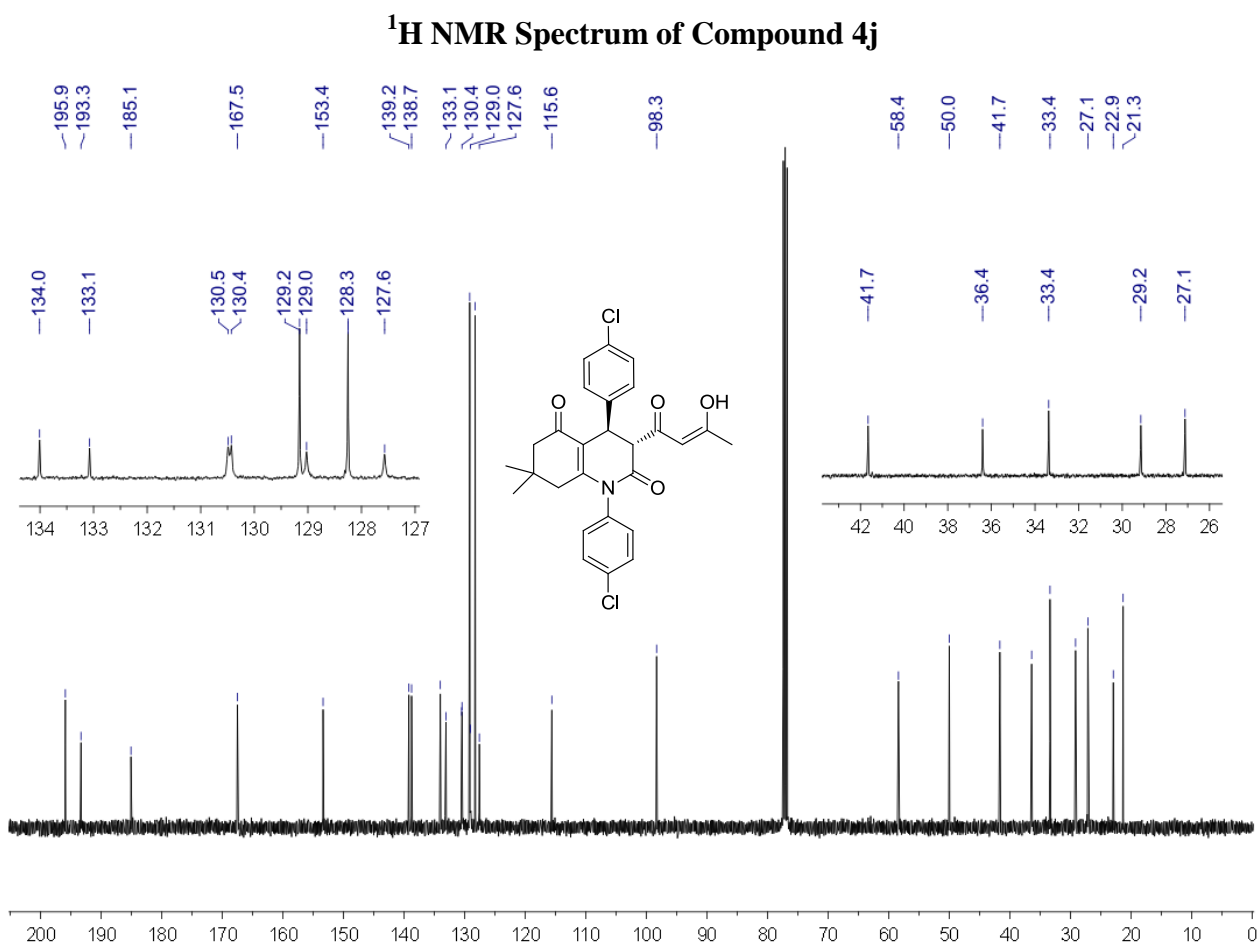

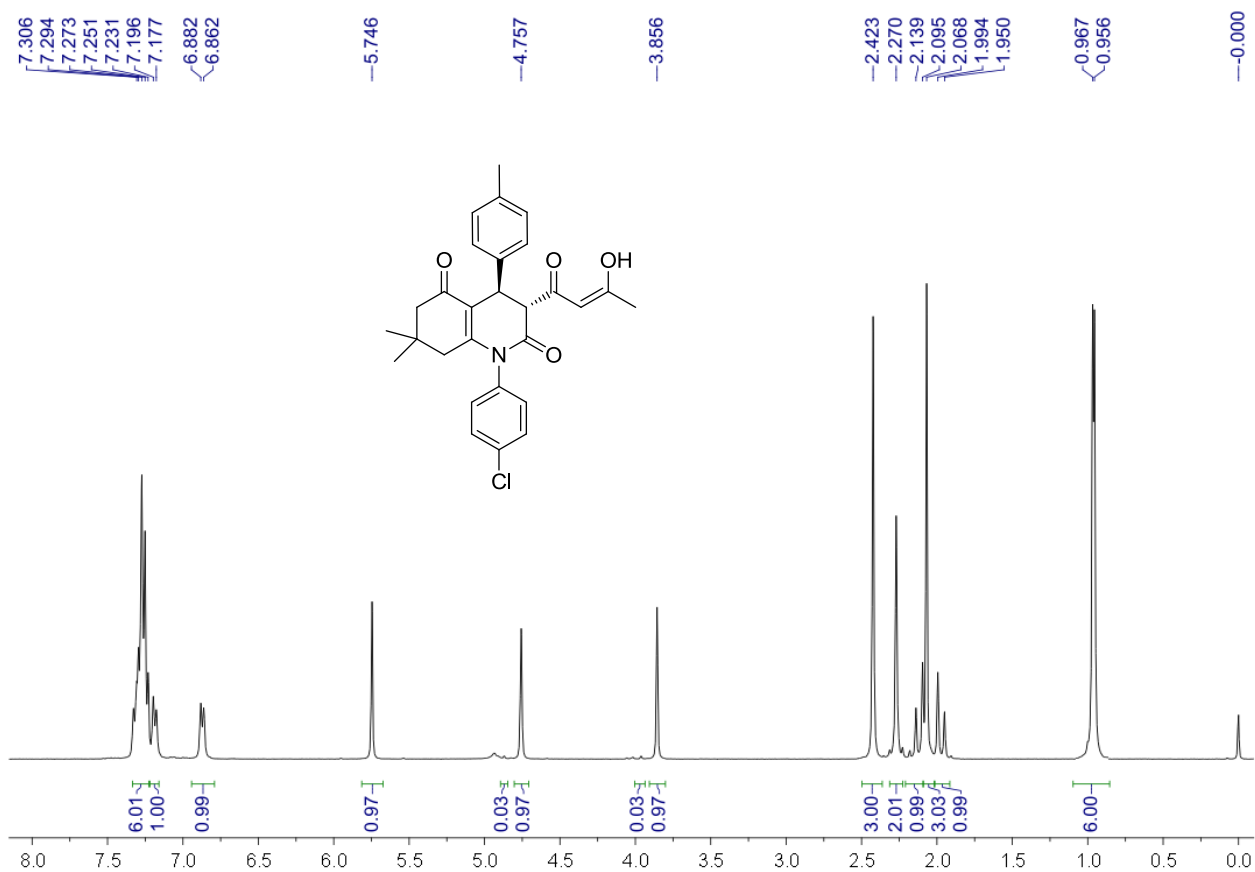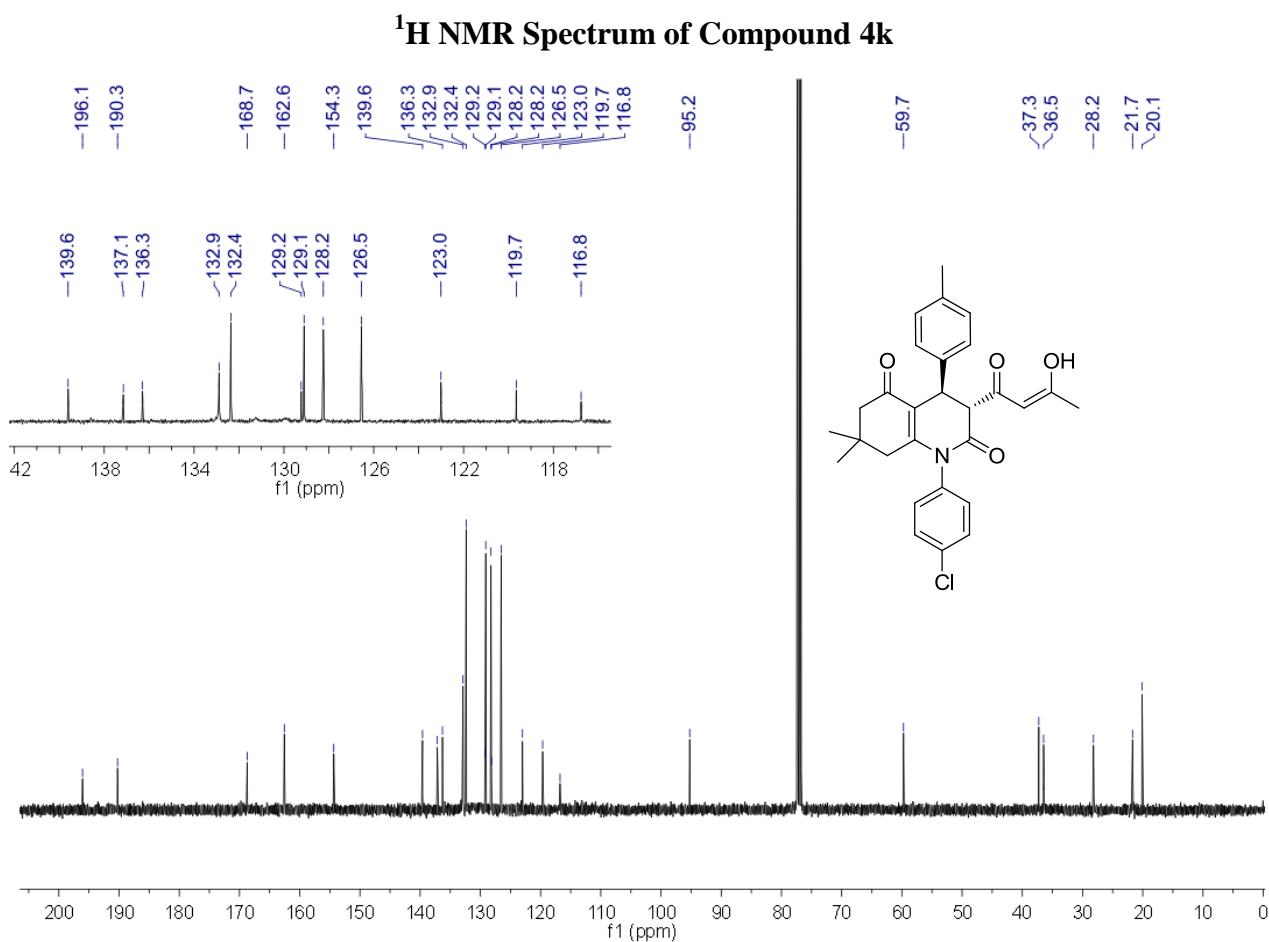

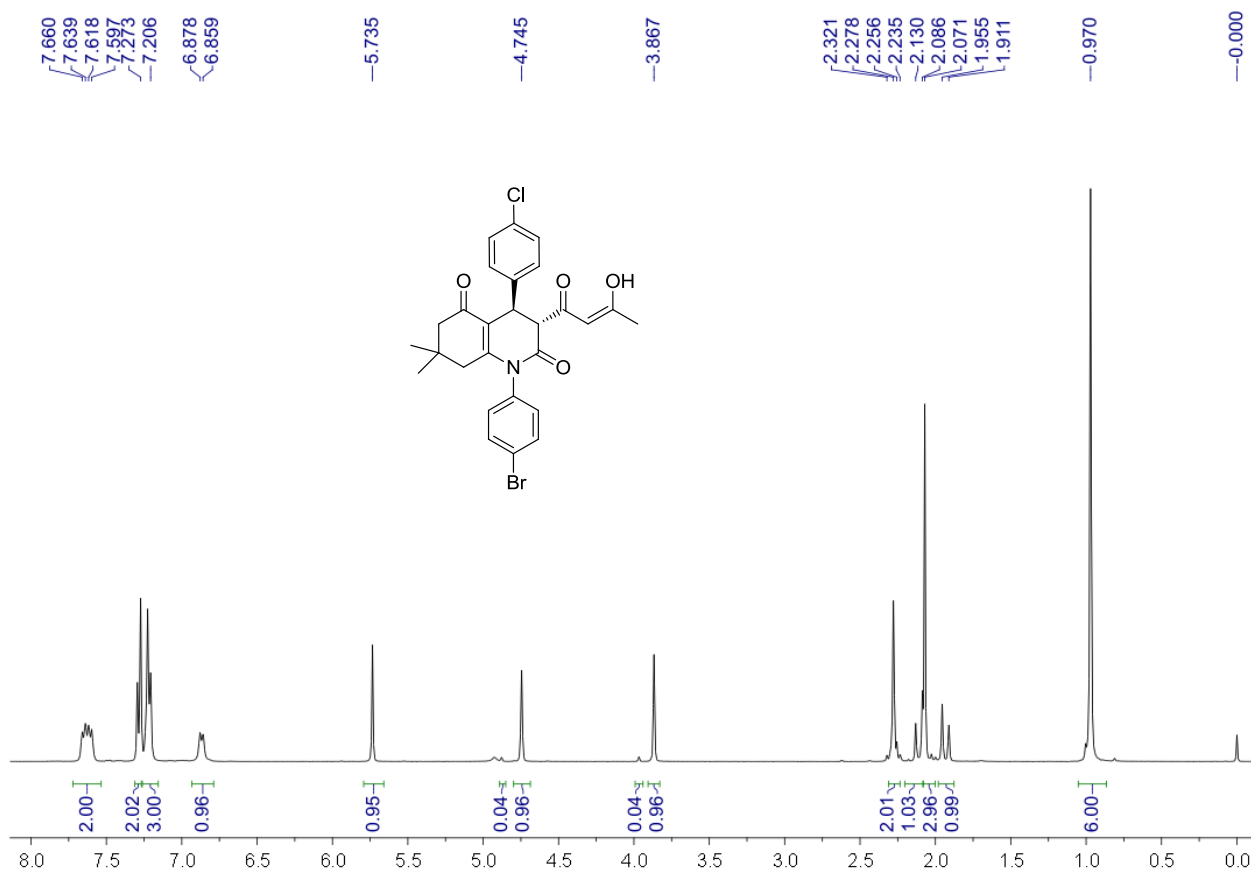

**<sup>1</sup>H NMR Spectrum of Compound 4l**

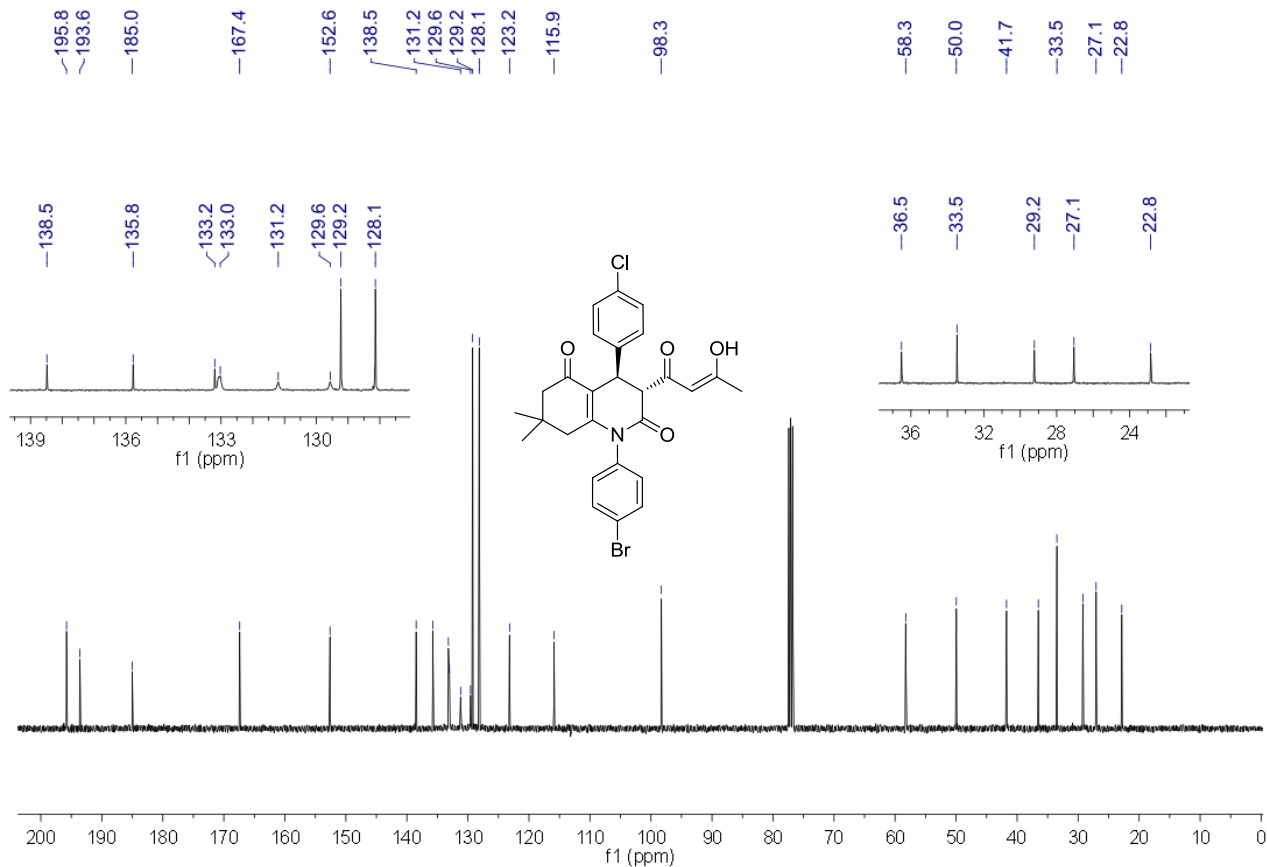

**<sup>13</sup>C NMR Spectrum of Compound 4l**

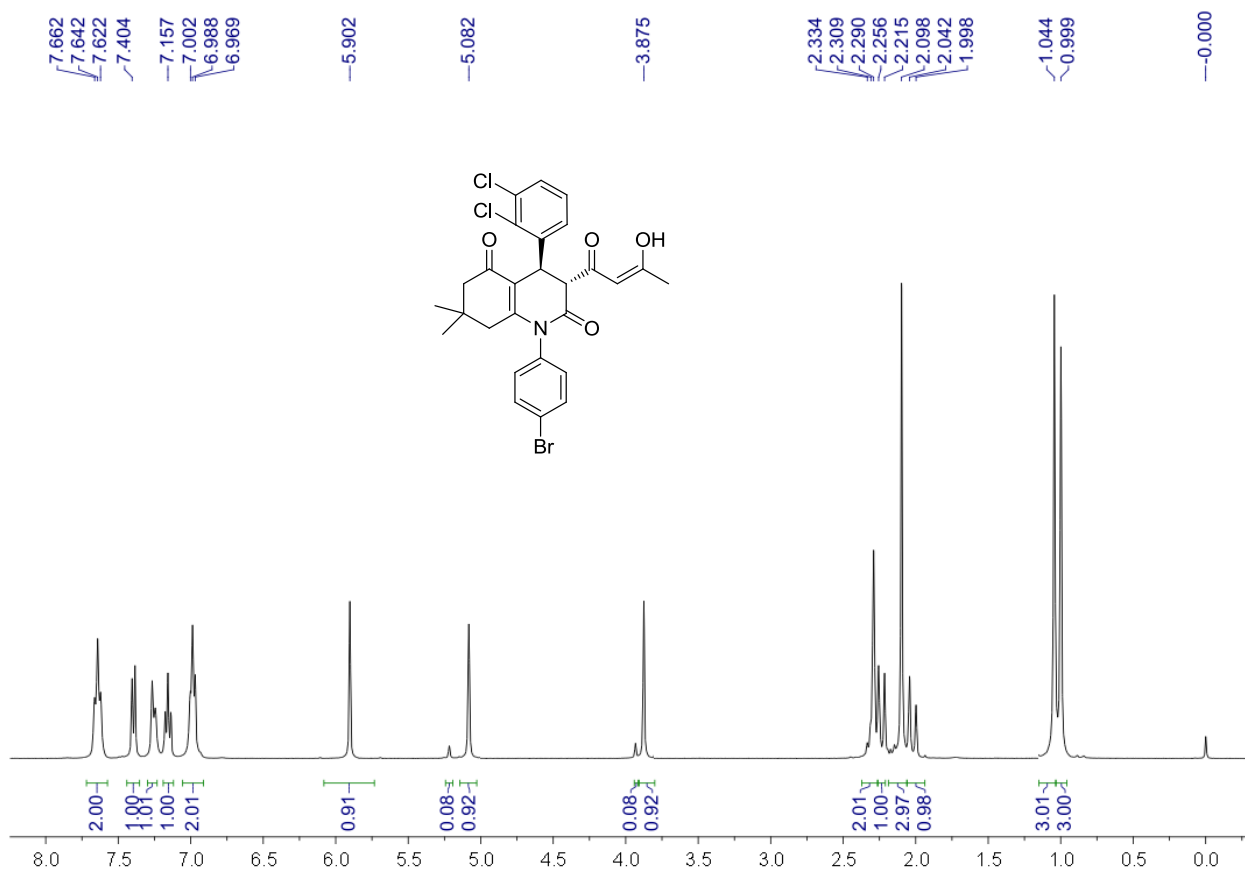

**<sup>1</sup>H NMR Spectrum of Compound 4m**

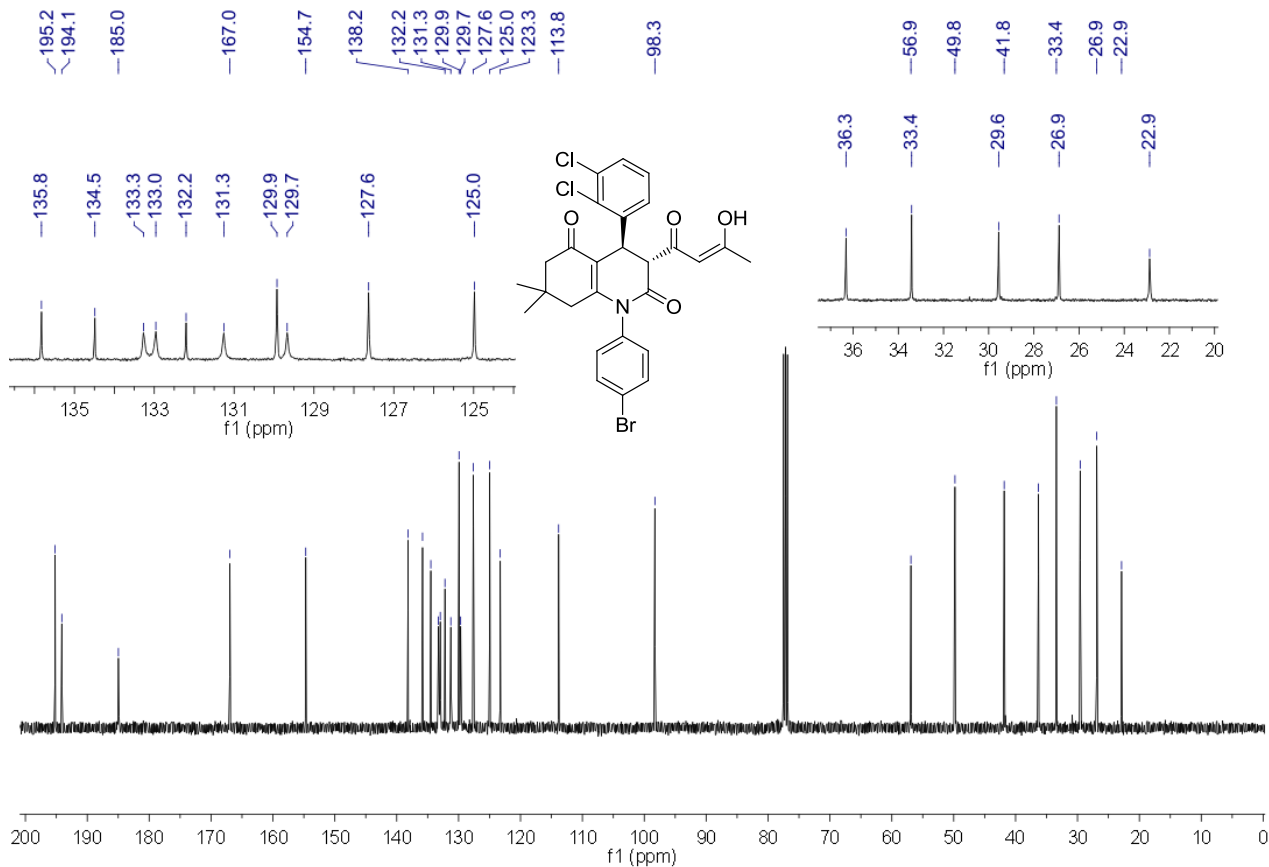

**<sup>13</sup>C NMR Spectrum of Compound 4m**

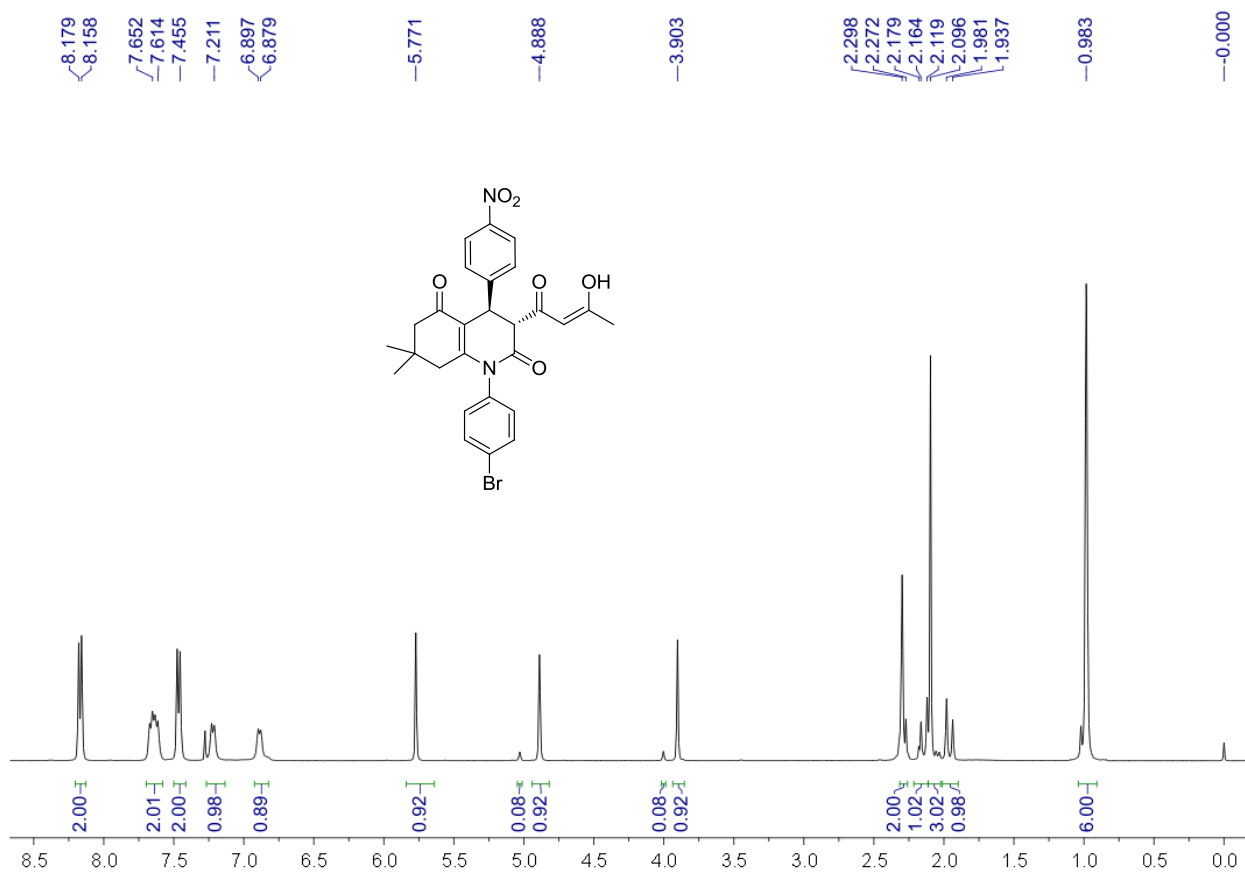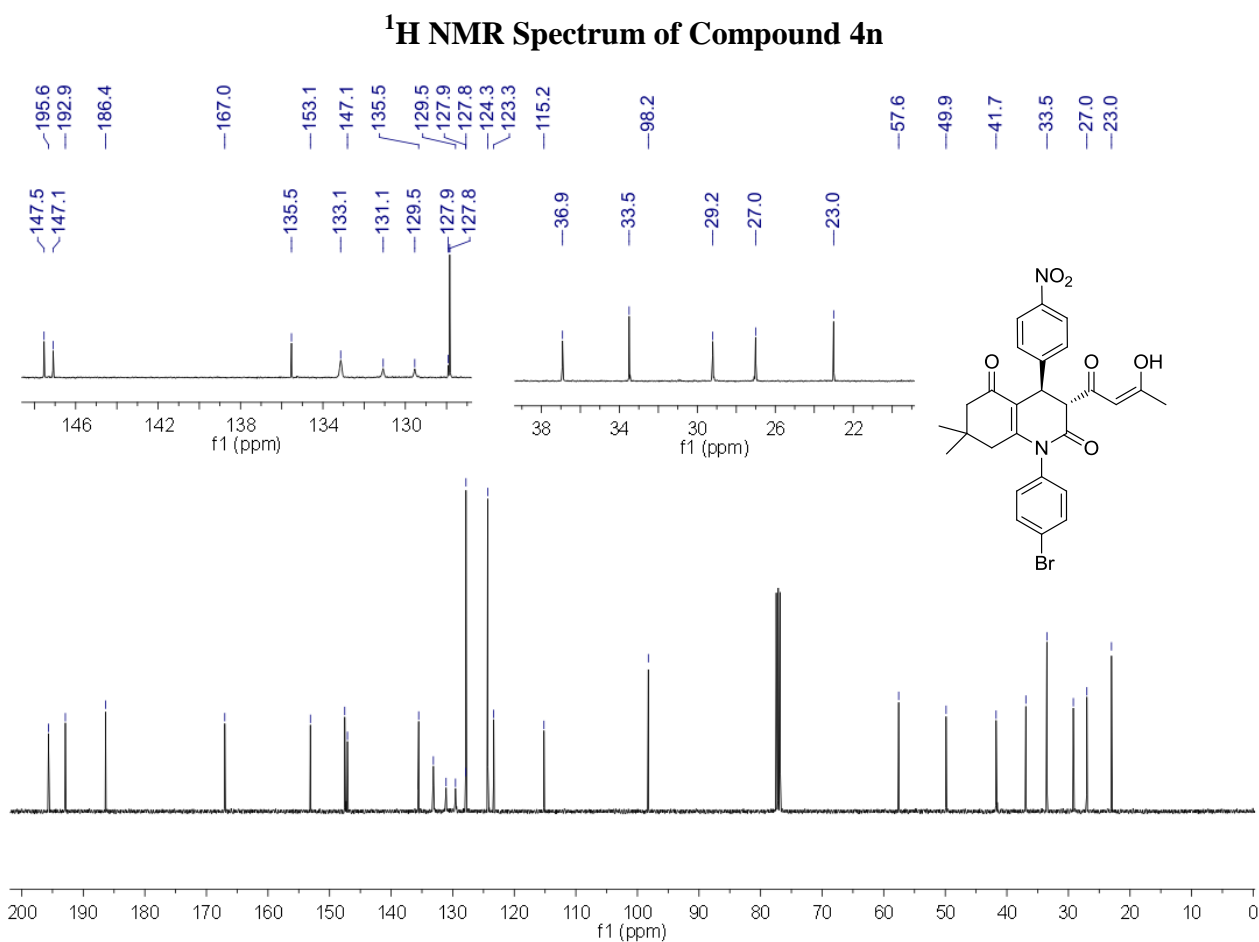

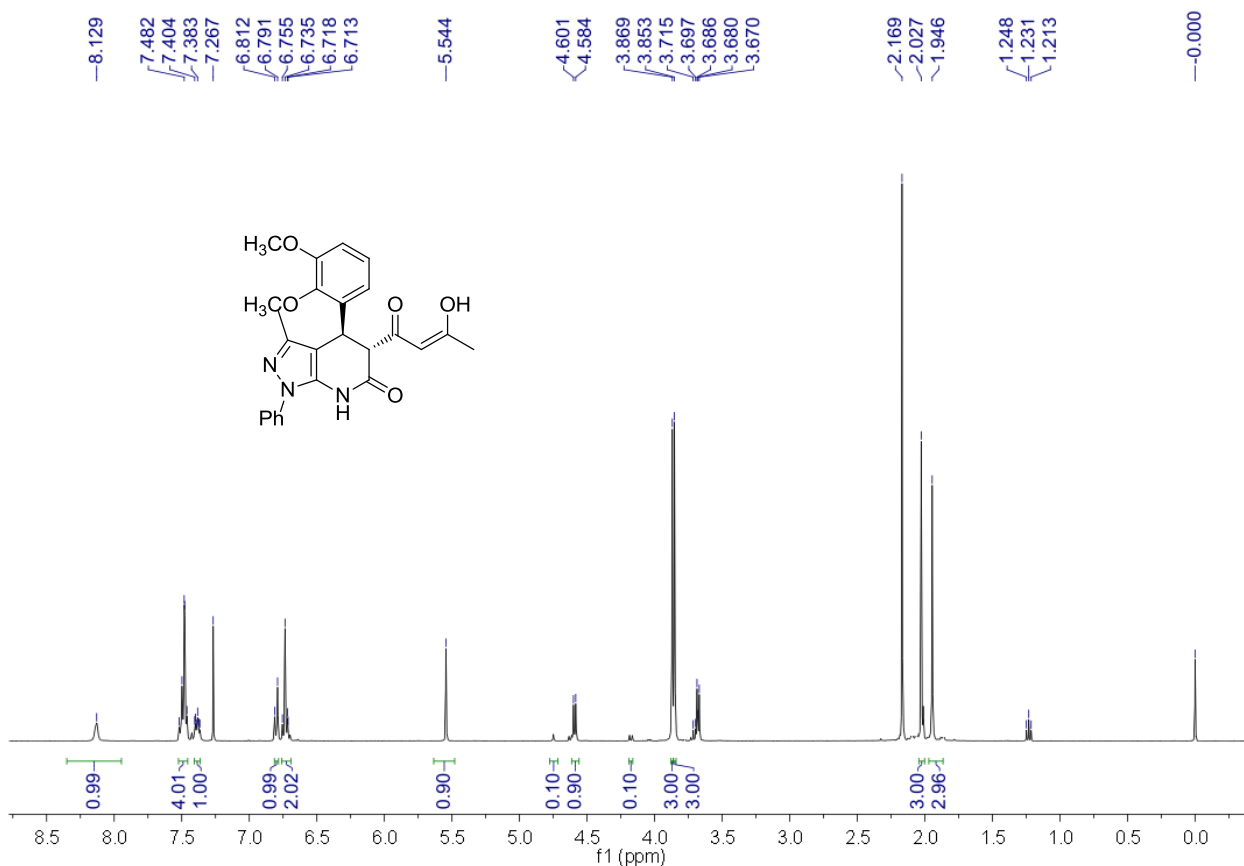

<sup>1</sup>H NMR Spectrum of Compound 6a

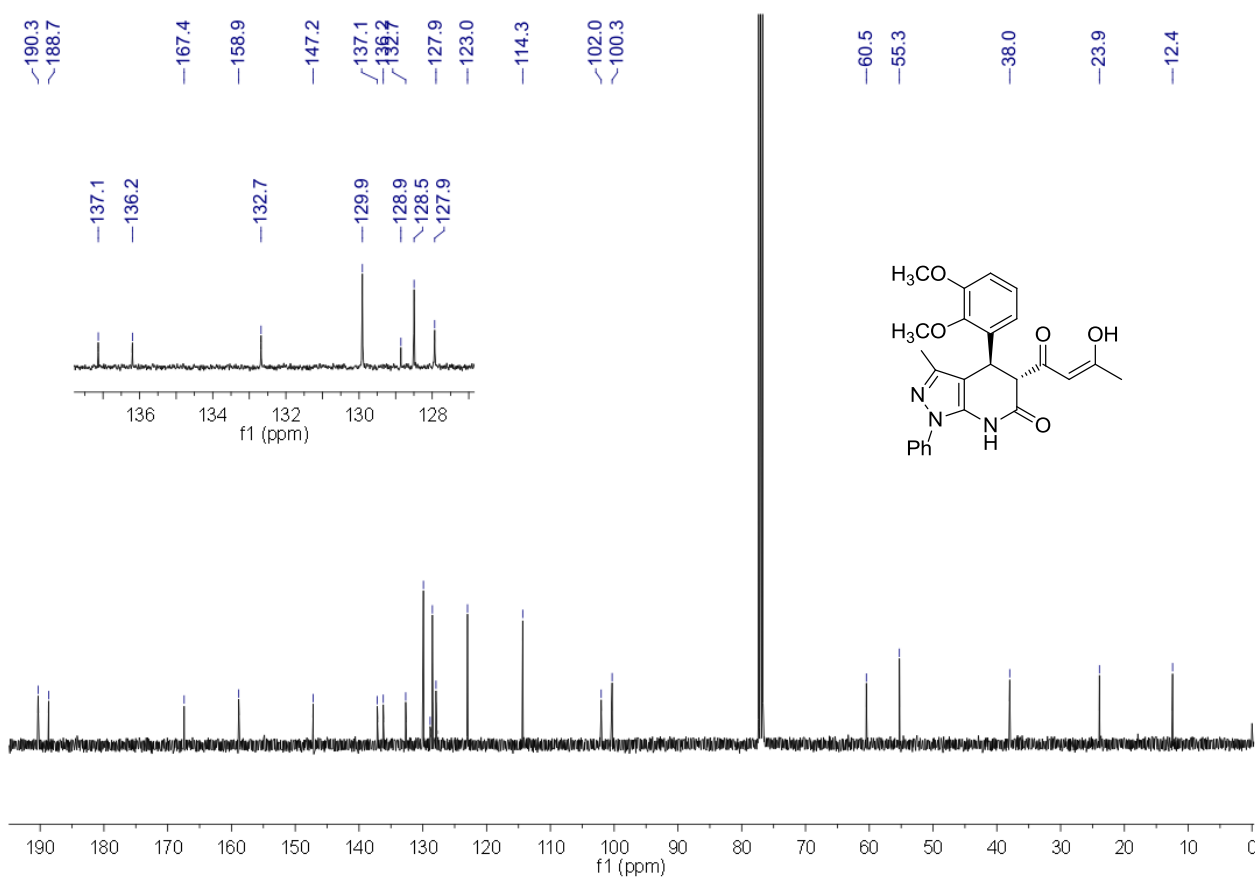

<sup>13</sup>C NMR Spectrum of Compound 6a

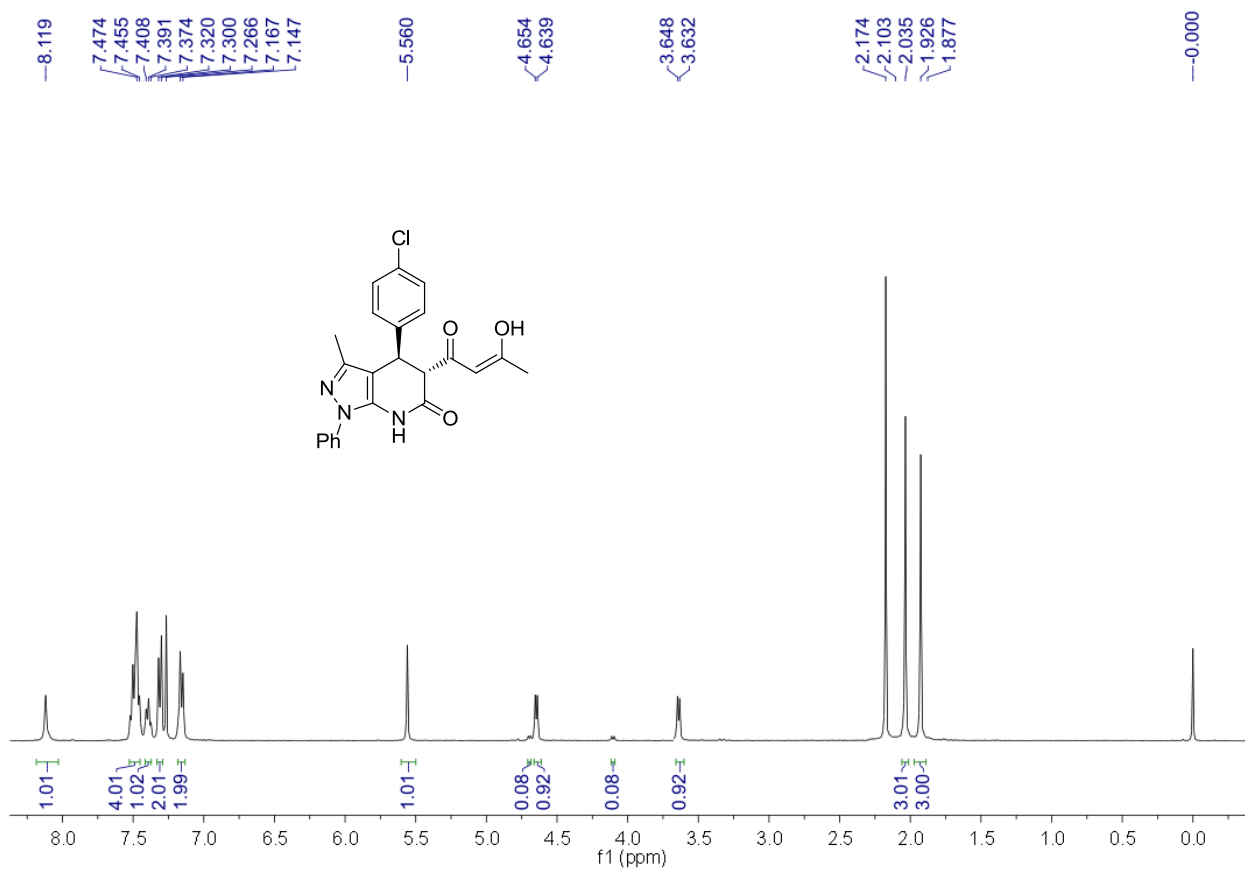

**<sup>1</sup>H NMR Spectrum of Compound 6b**

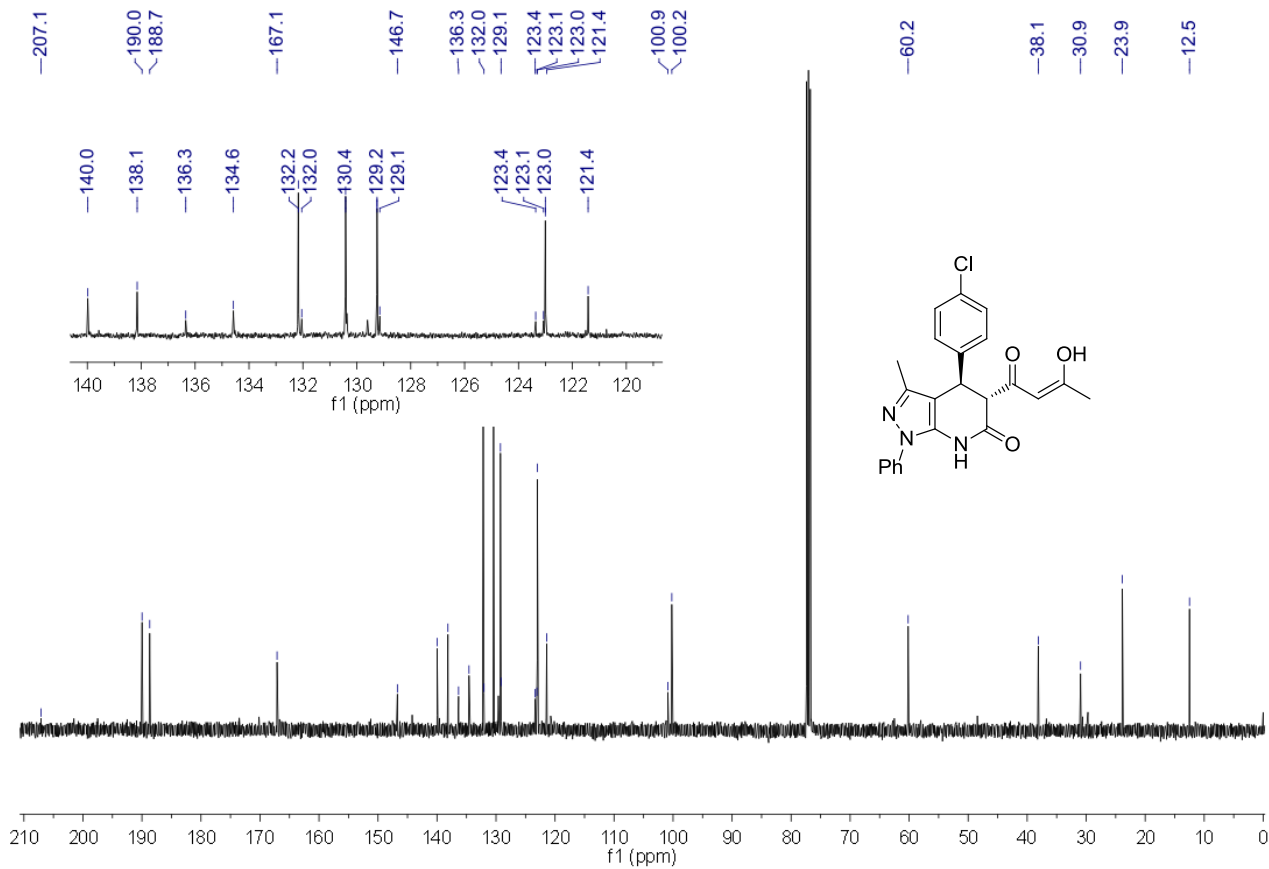

**<sup>13</sup>C NMR Spectrum of Compound 6b**

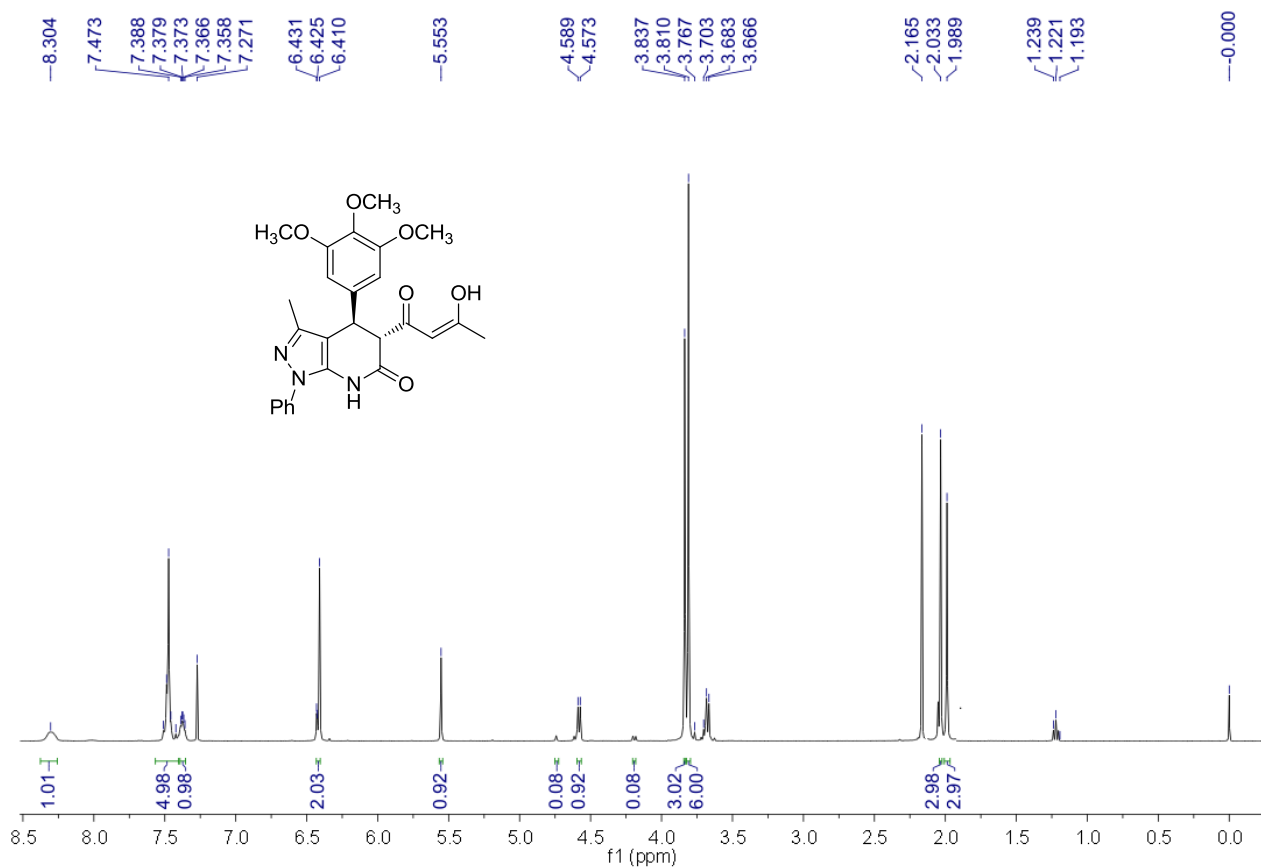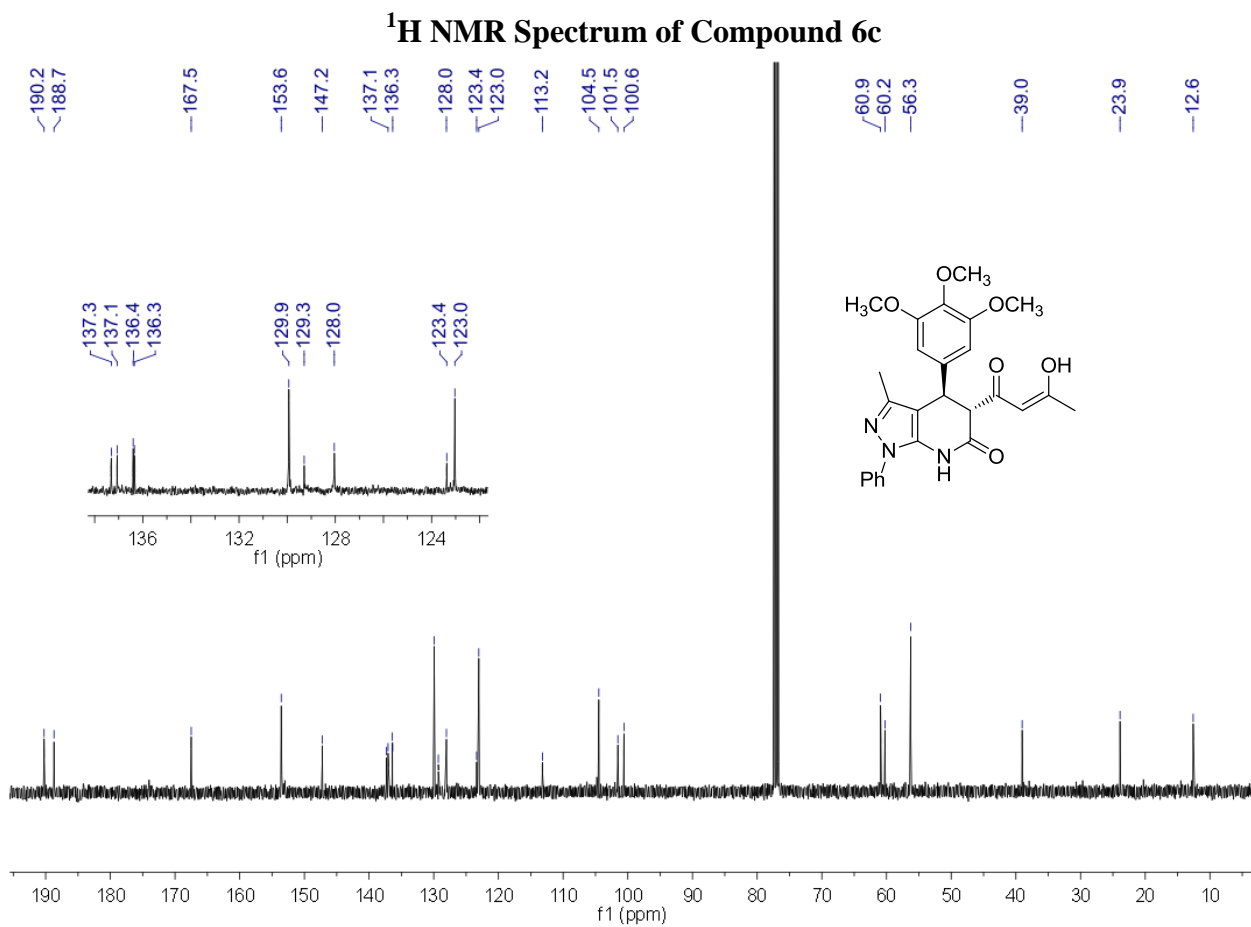

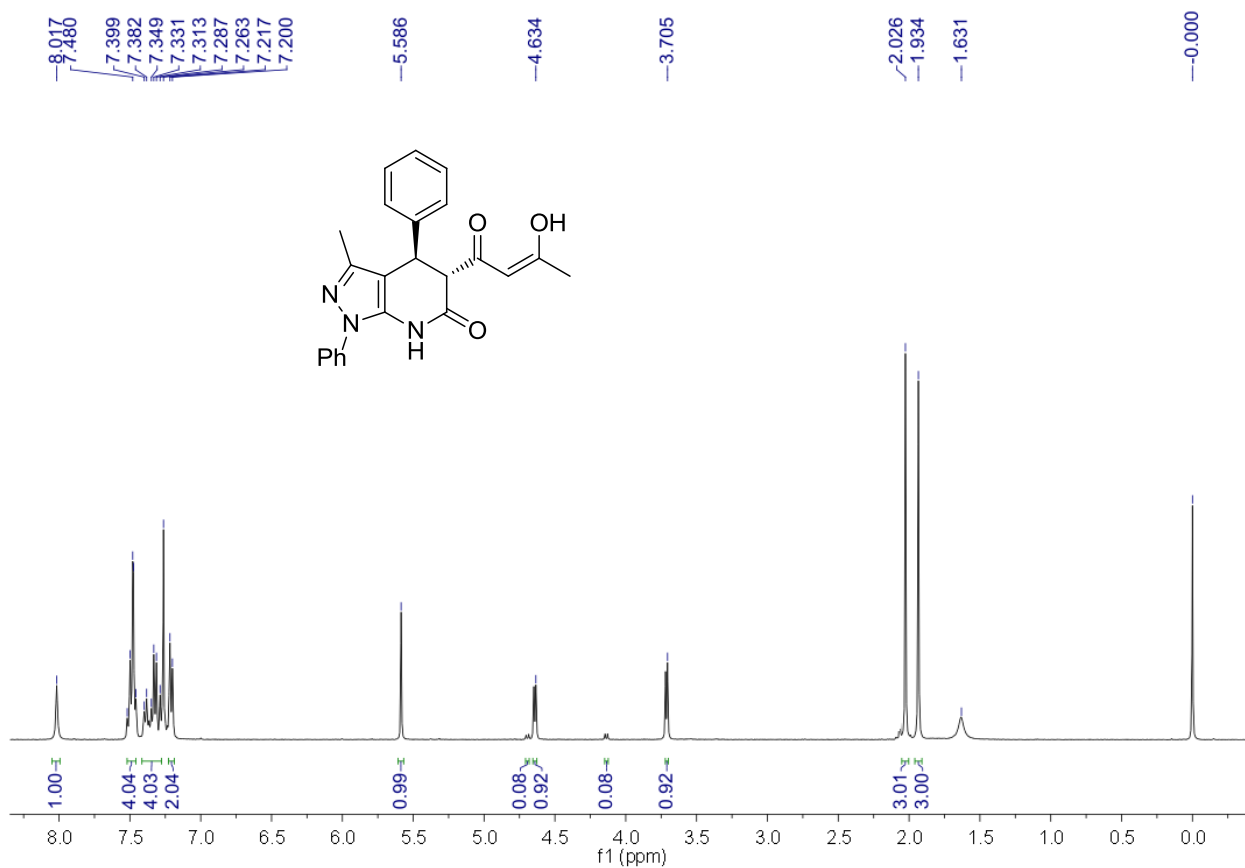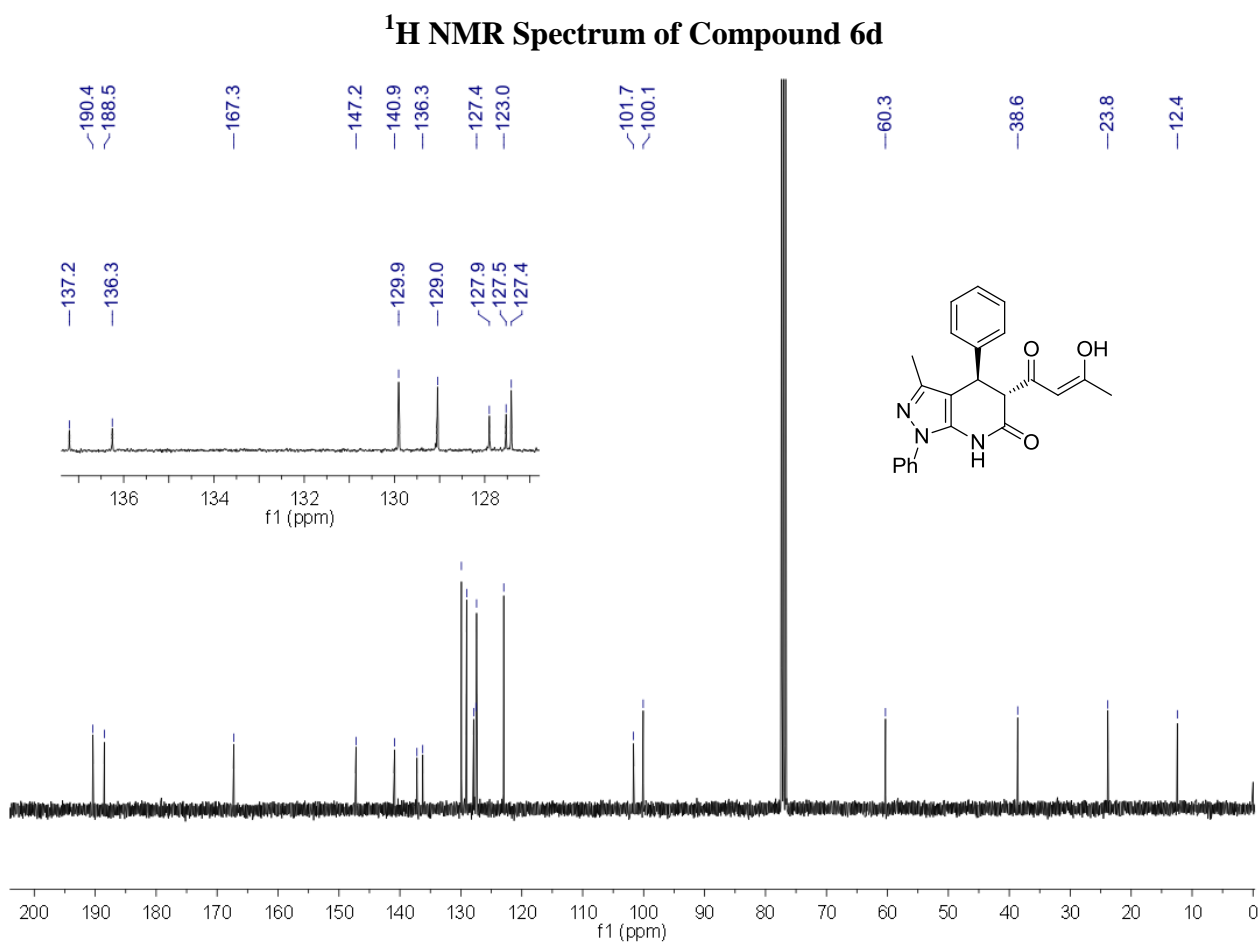

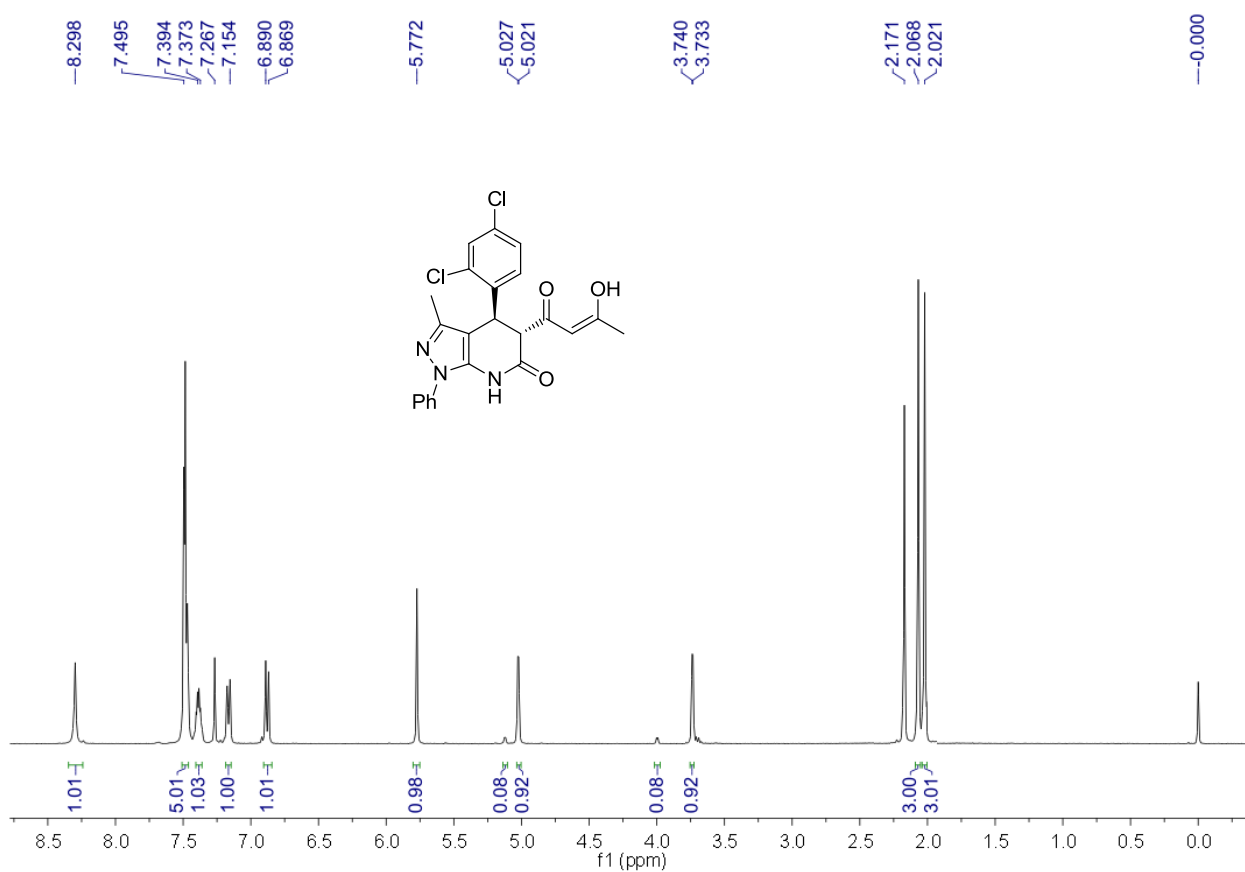

**<sup>1</sup>H NMR Spectrum of Compound 6e**

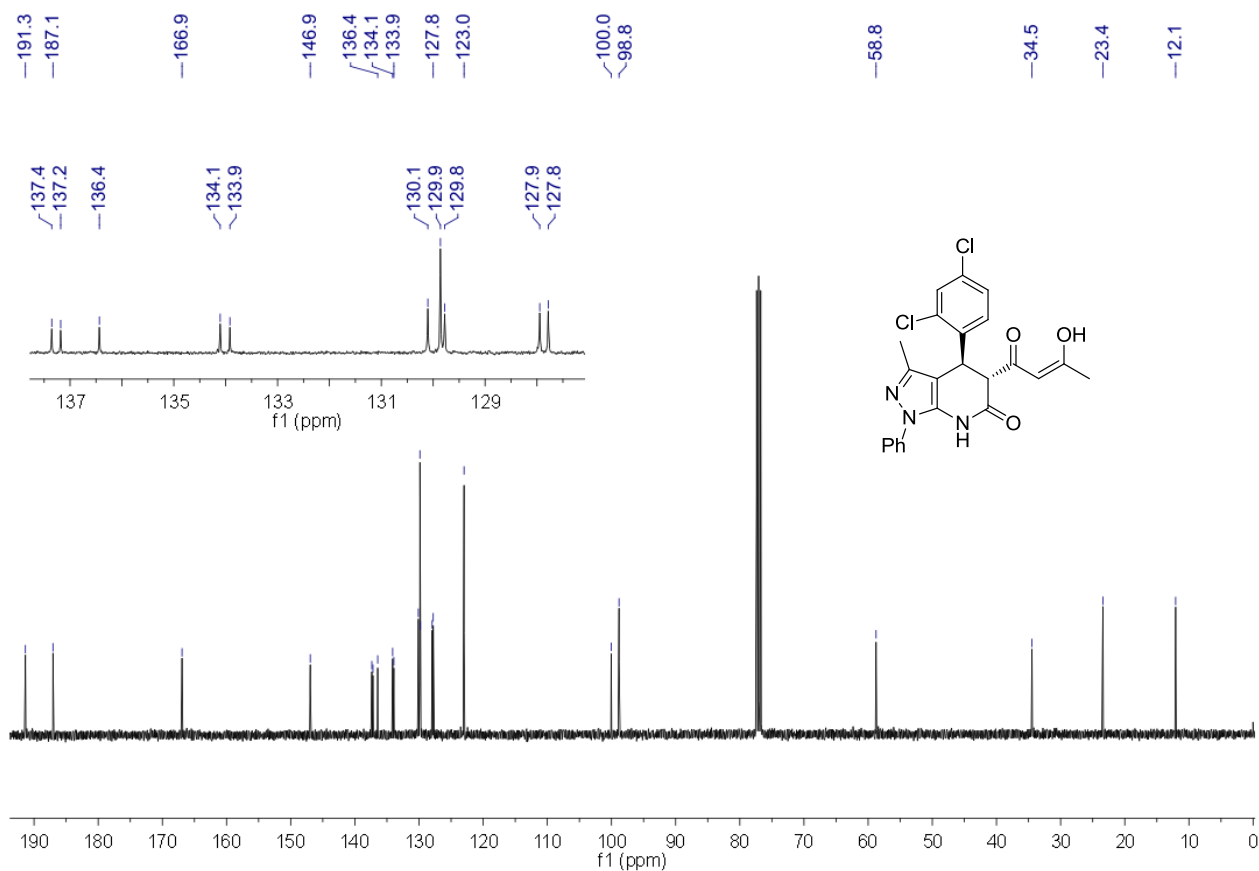

**<sup>13</sup>C NMR Spectrum of Compound 6e**

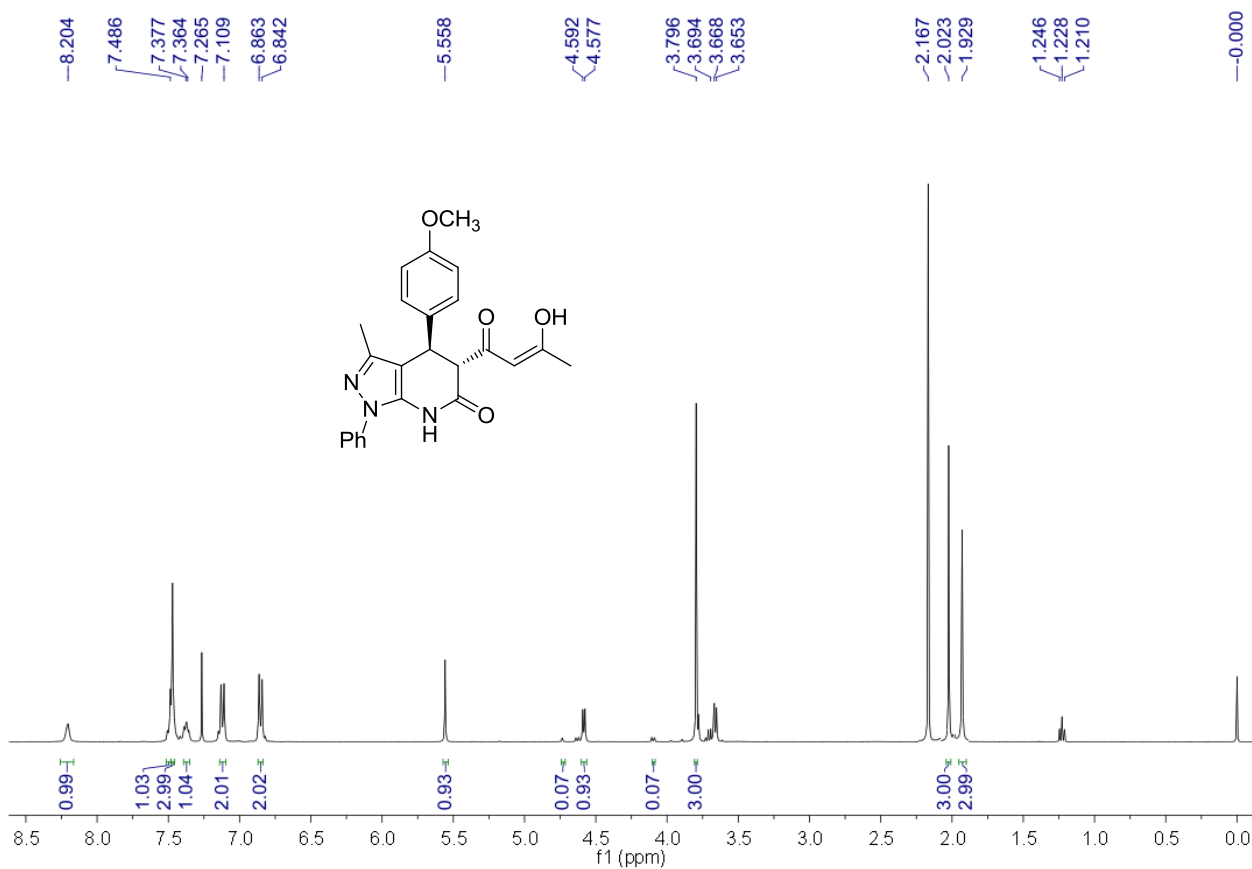

**<sup>1</sup>H NMR Spectrum of Compound 6f**

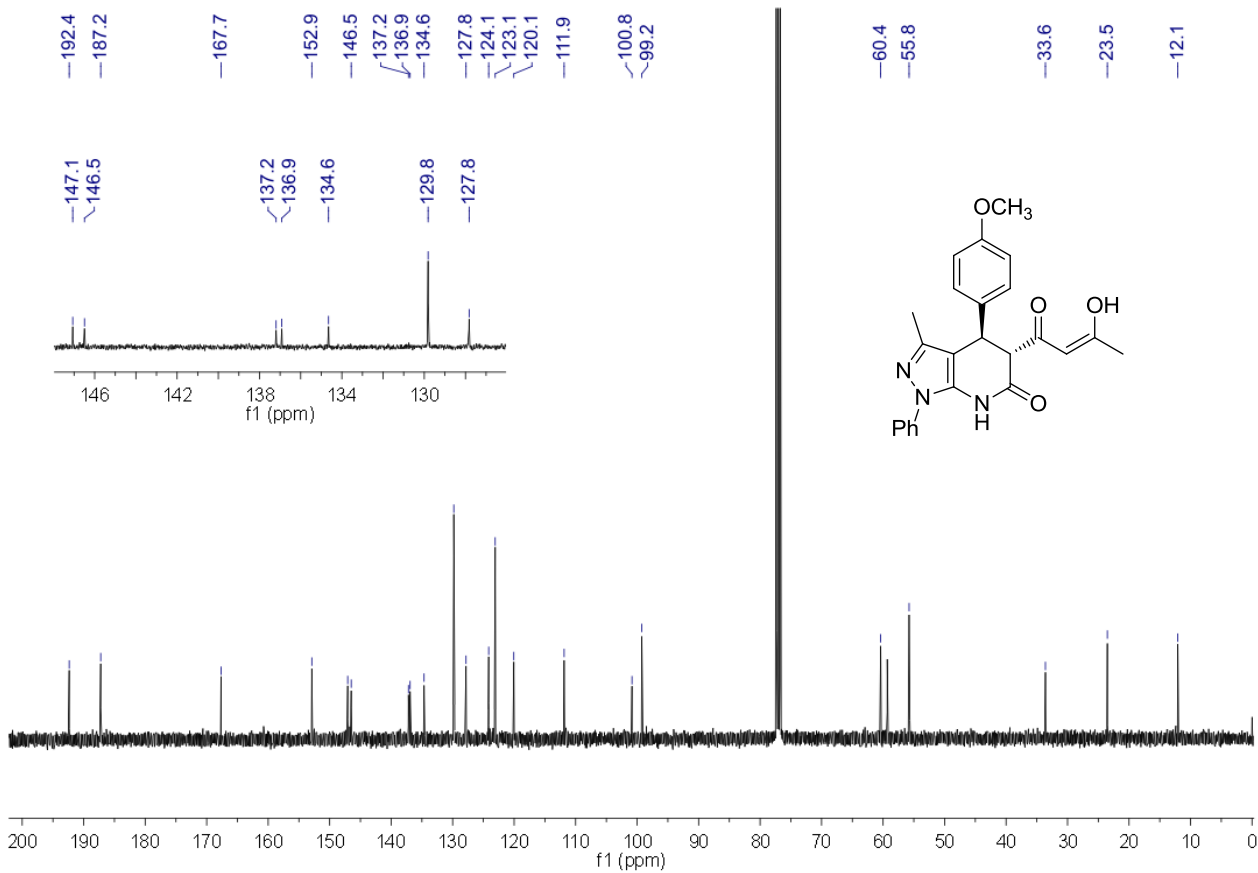

**<sup>13</sup>C NMR Spectrum of Compound 6f**

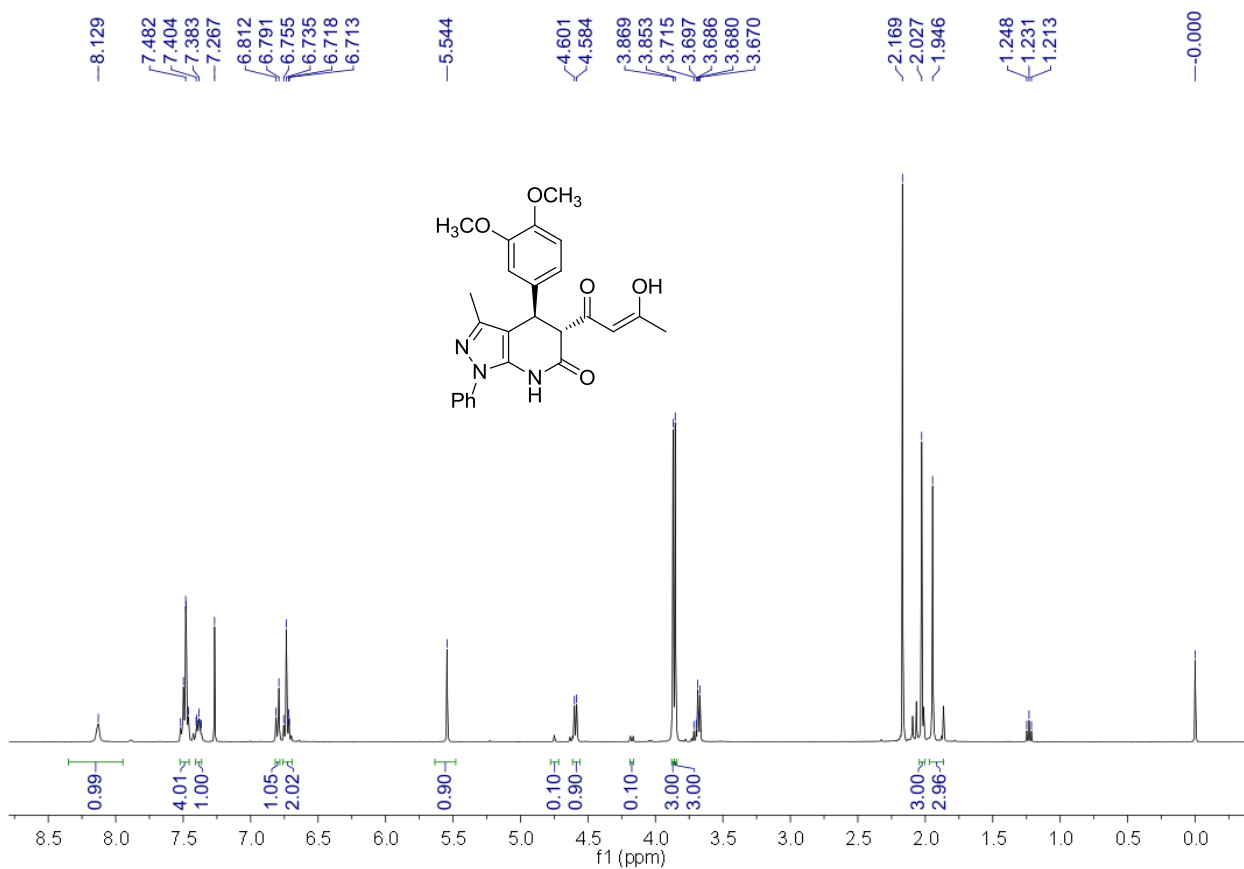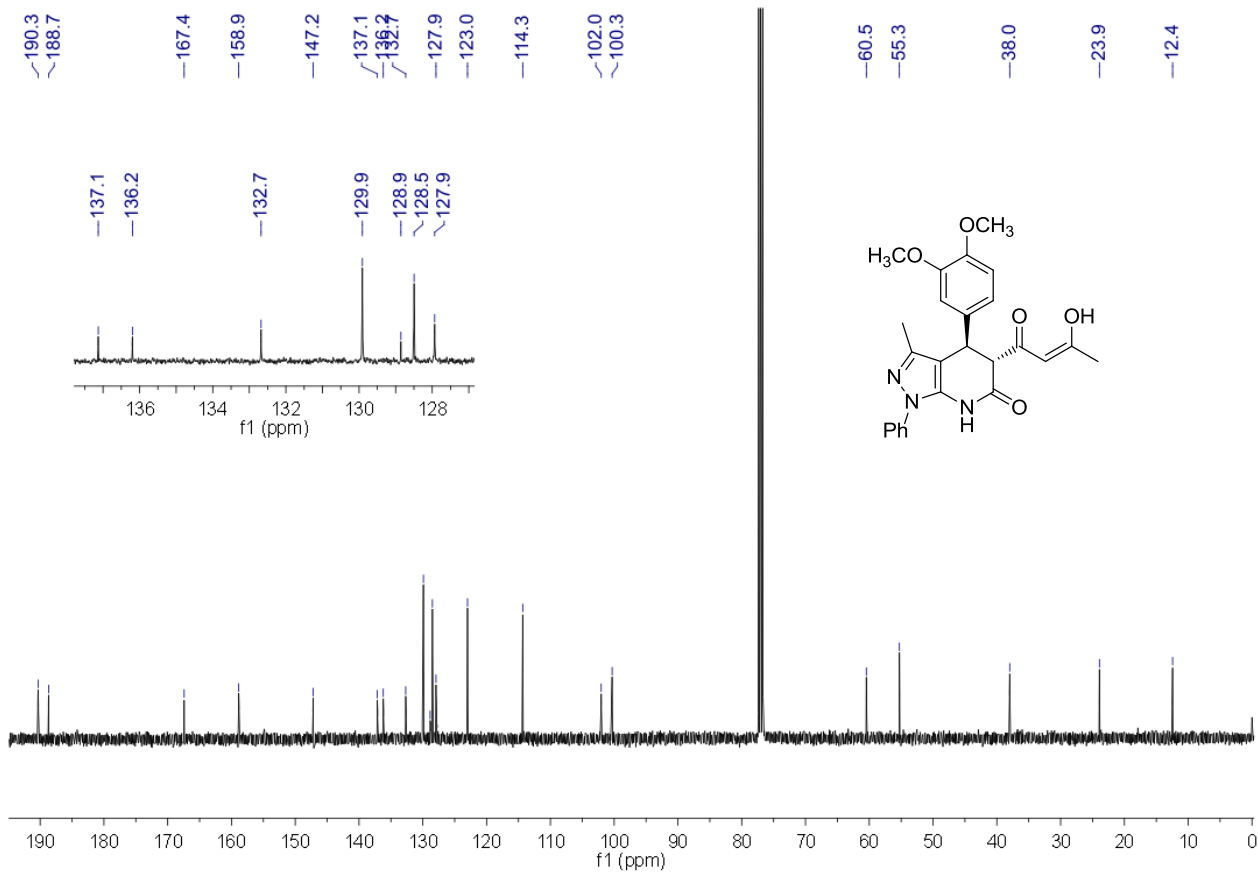

Supplement: c4ra10096d1.pdf [file c4ra10096d1.pdf]
